# Supplementary material for: Mechanical forces impair antigen discrimination by reducing differences in T‐cell receptor/peptide–MHC off‐rates
Source: PubMed Central journal article supplement (PMC10068313; doi:10.15252/embj.2022111841), 2022-12-09
Supplement: EMBJ-42-e111841-s008.pdf [file EMBJ-42-e111841-s008.pdf]

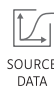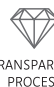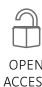

# Mechanical forces impair antigen discrimination by reducing differences in T-cell receptor/peptide–MHC off-rates

Johannes Pettmann<sup>1,†</sup> , Lama Awada<sup>2,†</sup> , Bartosz Różycki<sup>3</sup> , Anna Huhn<sup>1</sup>, Sara Faour<sup>2</sup>, Mikhail Kutuzov<sup>1</sup> , Laurent Limozin<sup>2</sup>, Thomas R Weikl<sup>4</sup> , P Anton van der Merwe<sup>1,\*</sup> , Philippe Robert<sup>2,5,\*\*,‡</sup>  & Omer Dushek<sup>1,\*\*\*,‡</sup> 

## Abstract

T cells use their T-cell receptors (TCRs) to discriminate between lower-affinity self and higher-affinity foreign peptide major-histocompatibility-complexes (pMHCs) based on the TCR/pMHC off-rate. It is now appreciated that T cells generate mechanical forces during this process but how force impacts the TCR/pMHC off-rate remains debated. Here, we measured the effect of mechanical force on the off-rate of multiple TCR/pMHC interactions. Unexpectedly, we found that lower-affinity TCR/pMHCs with faster solution off-rates were more resistant to mechanical force (weak slip or catch bonds) than higher-affinity interactions (strong slip bonds). This was confirmed by molecular dynamics simulations. Consistent with these findings, we show that the best-characterized catch bond, involving the OT-I TCR, has a low affinity and an exceptionally fast solution off-rate. Our findings imply that reducing forces on the TCR/pMHC interaction improves antigen discrimination, and we suggest a role for the adhesion receptors CD2 and LFA-1 in force-shielding the TCR/pMHC interaction.

**Keywords** antigen discrimination; molecular forces; T-cell receptor

**Subject Category** Immunology

**DOI** 10.15252/emboj.202211841 | Received 8 June 2022 | Revised 8 November 2022 | Accepted 16 November 2022 | Published online 9 December 2022

**The EMBO Journal (2023) 42: e111841**

See also: [JB Huppa & GJ Schütz](#) (April 2023)

## Introduction

T cells use their T-cell antigen receptors (TCRs) to recognize peptide antigens bound to major-histocompatibility-complexes (pMHCs), on the surface of antigen-presenting-cells (APCs). It is now well established that T cells discriminate between self and foreign pathogen (or cancer)-derived pMHC based on the kinetic off-rate of the interaction (Aleksic *et al.*, 2010; Govern *et al.*, 2010; Dushek *et al.*, 2011; Pettmann *et al.*, 2021). Consistent with this mechanism, the off-rate ( $k_{\text{off}}$ ) measured in solution with purified TCR and pMHC can usually predict the T-cell response. Recently, a number of studies have shown that T cells can generate forces of up to 150 pN as they probe surfaces for pMHC (Husson *et al.*, 2011; Feng *et al.*, 2017; Colin-York *et al.*, 2019; Ma *et al.*, 2022) and can impose forces directly on TCR/pMHC interactions (Göhring *et al.*, 2021; Ma *et al.*, 2022). This observation is important because T cells discriminate antigens based on the off-rate in the membrane, termed the membrane off-rate ( $k_{\text{off}}^{\text{m}}$ , Fig 1A), and this can be affected by force (Zhu *et al.*, 2019). Precisely how molecular forces on the TCR/pMHC interaction impact  $k_{\text{off}}^{\text{m}}$ , and antigen discrimination is therefore critically important.

It is widely believed that molecular force improves discrimination between low-affinity self and high-affinity foreign antigens (Zhu *et al.*, 2019). This is based on experimental evidence that force increases  $k_{\text{off}}^{\text{m}}$  of low-affinity pMHC interactions (termed slip-bonds) while decreasing  $k_{\text{off}}^{\text{m}}$  of higher-affinity pMHC interaction (catch bonds), thus magnifying differences in  $k_{\text{off}}$ . Evidence for catch bonds has been obtained mainly using the biomembrane force probe (BFP) (Liu *et al.*, 2014; Sibener *et al.*, 2018; Wu *et al.*, 2019; Zhao *et al.*, 2022), which applies external forces to TCRs on the surface of T cells. It is notable that the magnitude of these catch bonds is appreciably reduced (Liu *et al.*, 2015) or abolished (Limozin *et al.*, 2019) when

1 Sir William Dunn School of Pathology, University of Oxford, Oxford, UK

2 Laboratoire Adhesion et Inflammation, Aix Marseille University UM 61, INSERM UMRs 1067, CNRS UMR 7333, Marseille, France

3 Institute of Physics, Polish Academy of Sciences, Warsaw, Poland

4 Max Planck Institute of Colloids and Interfaces, Potsdam, Germany

5 Assistance Publique-Hôpitaux de Marseille, Marseille, France

\*Corresponding author. Tel: +44 1865 275593; E-mail: anton.vandermerwe@path.ox.ac.uk

\*\*Corresponding author. Tel: +33 4 91 82 88 50; E-mail: philippe.robert@inserm.fr

\*\*\*Corresponding author. Tel: +44 1865 275576; E-mail: omer.dushek@path.ox.ac.uk

†These authors contributed equally to this work

‡These authors contributed equally to this work

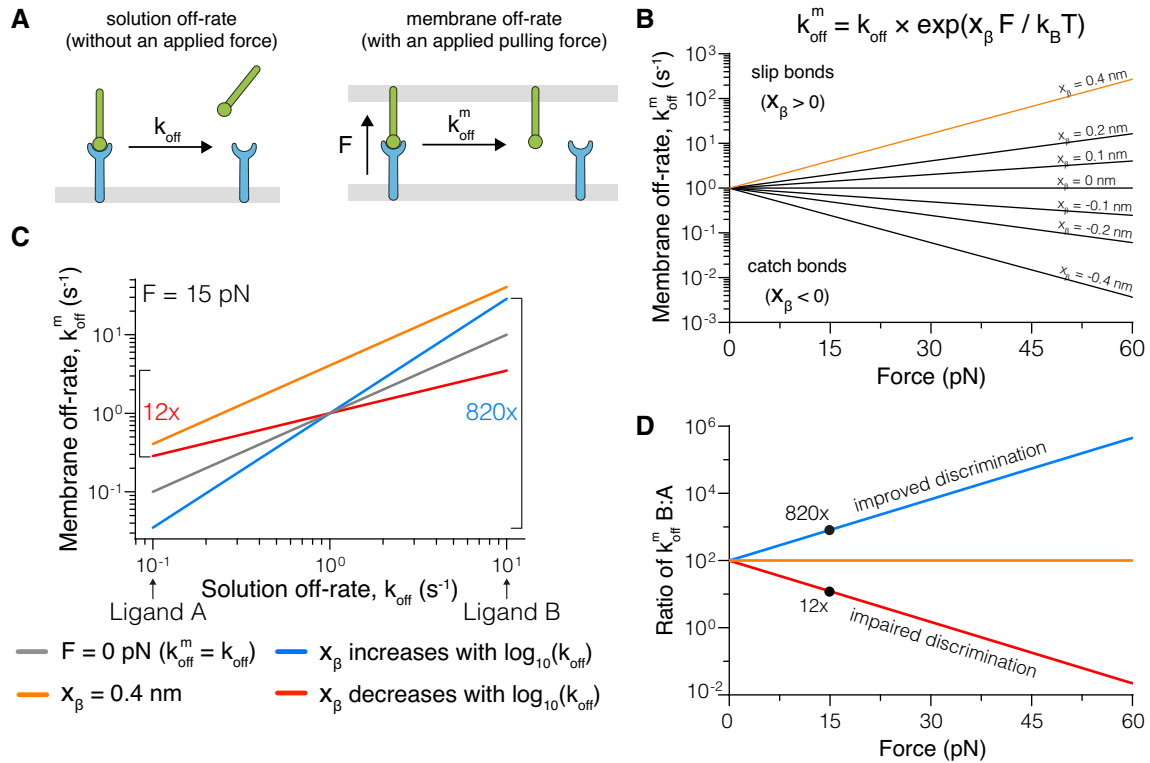

**Figure 1. Modelling predicts that force can improve or impair antigen discrimination.**

- A Depiction of (left) the dissociation of a soluble ligand and its solution off-rate ( $k_{off}$ ) and (right) a membrane-anchored ligand and its membrane off-rate ( $k_{off}^m$ ), where the interaction is exposed to a pulling force ( $F$ ).
- B The dependence of  $k_{off}^m$  on the pulling force at the indicated force sensitivity parameters ( $x_{\beta}$ ) with  $k_{off} = 1 s^{-1}$ .
- C Dependence of  $k_{off}^m$  on  $k_{off}$  at zero force (grey) or under an applied force of 15 pN (coloured lines), when  $x_{\beta}$  is constant (orange), positively (blue), or negatively (red) correlated with the solution  $k_{off}$ . In this example a 100-fold change in  $k_{off}$  (Ligand A vs. Ligand B) can be increased to a ~ 820-fold or decreased to a ~ 12-fold change in  $k_{off}^m$ , depending on whether  $x_{\beta}$  is positively or negatively correlated with the  $k_{off}$ , respectively.
- D The fold-change in  $k_{off}^m$  for Ligand B versus Ligand A over the applied force.

Data information: All calculations are performed using the formula in (B) with  $x_{\beta} = 0.4$  nm (orange),  $x_{\beta} = +0.3 \log_{10}(k_{off})$  (blue), and  $x_{\beta} = -0.3 \log_{10}(k_{off})$  (red) in panels C and D.

applying force to purified forms of the same TCRs. It follows that the catch bond behaviour observed using BFP may be secondary to TCR signalling rather than intrinsic to the TCR/pMHC interaction. While the correlation between the BFP-measured catch bond behaviour and TCR signalling (Liu *et al*, 2014; Sibener *et al*, 2018; Wu *et al*, 2019; Zhu *et al*, 2019; Zhao *et al*, 2022) is consistent with catch bonds being required for TCR signalling, these data are also consistent with causality being reversed. Further studies on a wider range of TCR/pMHC interactions, and in the absence of TCR signalling, are required to fully elucidate the relationship between force, kinetics, and T-cell activation.

Several mechanisms are likely to influence the forces experienced by TCR/pMHC interactions. Firstly, in order for TCRs to engage pMHC the T cell and APC membranes need to be brought to within 14 nm (van der Merwe & Dushek, 2011), which requires compression of the large molecules that form the glycocalyx, such as CD45 and CD43, which span 21–45 nm (Chang *et al*, 2016; Siller-Farfán & Dushek, 2018). By resisting compression, these glycocalyx molecules would generate forces on the TCR/pMHC interaction that are predicted to be 20 pN (Allard *et al*, 2012). Secondly, the dynamics of actin-based microvilli-like protrusions that form close contacts between T cells and APC membranes may directly or indirectly pull

on TCRs with forces as high as 150 pN (Sage *et al*, 2012; Cai *et al*, 2017; Colin-York *et al*, 2019). Finally, adhesion receptor/ligand interactions are likely to modulate the forces experienced by TCR/pMHC interactions (Huse, 2017). For example, the adhesion receptors CD2 and LFA-1 can improve antigen sensitivity (Siller-Farfán & Dushek, 2018) and antigen discrimination (Pettmann *et al*, 2021), and it is plausible that they do so, at least in part, by influencing the forces experienced by TCR/pMHC interactions.

Here, using a cell-free system which eliminates TCR signalling, we found that force increased the off-rate of most TCR/pMHC interactions. Unexpectedly, lower-affinity interactions were least sensitive to force and more likely to form catch bonds than higher-affinity interactions, which showed the highest sensitivity to force and this was also observed with molecular dynamics simulations. We show that the best-characterized catch bond, involving the OT-I TCR, has an unusually low affinity and the fastest  $k_{off}$  yet reported for an agonist TCR/pMHC interaction. Our results imply that force will reduce differences between TCR/pMHC  $k_{off}^m$  and therefore impair antigen discrimination. By incorporating force into the kinetic proofreading model, we show that force-shielding can account for the ability of adhesion receptors to enhance antigen

discrimination. Our study clarifies the role of force in T-cell antigen recognition and reconciles apparently contradictory reports.

## Results

### Theoretical modelling predicts that mechanical forces can improve or impair antigen discrimination

To investigate how forces affect antigen discrimination, we used Bell's well-established phenomenological model (Bell, 1978). It provides a simple relationship between the applied force and  $k_{\text{off}}^{\text{m}}$ , which depends on a receptor/ligand force sensitivity parameter ( $x_{\beta}$ ). When  $x_{\beta} > 0$ , force increases  $k_{\text{off}}^{\text{m}}$ , forming a slip-bond and when  $x_{\beta} < 0$ , force decreases  $k_{\text{off}}^{\text{m}}$  forming a catch bond (Fig 1B). In short, the sensitivity of the bond to force increases as the value of its force sensitivity parameter increases.

If all pMHCs that bind the same TCR had the same force sensitivity (i.e.  $x_{\beta}$  is constant), then an applied force will increase the  $k_{\text{off}}$  of all pMHCs by the same factor (Fig 1C, orange). Because of this, the ratio of the  $k_{\text{off}}^{\text{m}}$  between any two pMHC ligands will be unaffected by force (Fig 1D). Given that antigen discrimination is dependent on the fold change in  $k_{\text{off}}^{\text{m}}$  (van der Merwe & Dushek, 2011; Zhu et al, 2019), it follows that, if force sensitivity is constant, an applied force would not impact antigen discrimination.

We next explored how force would affect antigen discrimination if the force sensitivity is not constant but varies with  $k_{\text{off}}$  (or affinity, if  $k_{\text{on}}$  remains constant). It has been proposed that higher-affinity TCR ligands form catch bonds whereas lower-affinity ligands form slip-bonds (Liu et al, 2014; Das et al, 2015), implying that the force sensitivity increases as the  $k_{\text{off}}$  increases. We confirmed this using our model, which shows that applied force amplifies the fold change in  $k_{\text{off}}$  to produce larger fold changes in  $k_{\text{off}}^{\text{m}}$  (Fig 1C and D blue). Conversely, if the force sensitivity decreases as the  $k_{\text{off}}$  increases then applied force dampens differences in  $k_{\text{off}}$  producing smaller fold changes in  $k_{\text{off}}^{\text{m}}$  (Fig 1C and D red). This is illustrated with two test ligands that differ in  $k_{\text{off}}$  by 100-fold showing that the fold-change in  $k_{\text{off}}^{\text{m}}$  is  $> 100$ -fold when  $x_{\beta}$  increases with  $k_{\text{off}}$  (i.e. improved discrimination) but  $< 100$ -fold when  $x_{\beta}$  decreases with  $k_{\text{off}}$  (i.e. impaired discrimination) under an applied force (Fig 1D).

### The force sensitivity of TCR/pMHC interactions decreases with off-rate or dissociation constant

Given that the impact of force on antigen discrimination critically depends on the relationship between  $k_{\text{off}}$  and  $x_{\beta}$ , we set out to directly measure it. We selected the 1G4 and A6 TCRs for this study because we recently obtained accurate solution affinities for these TCRs binding a panel of peptide ligands presented on HLA-A\*02:01 (Pettmann et al, 2021) (Fig EV1) and used our laminar flow chamber (LFC) apparatus to examine how force impacts bond duration (Robert et al, 2012; Limozin et al, 2019). In this assay, beads coated with TCR flow over a low density of pMHC while a camera records bead motion (Fig 2A, Movie EV1). As a result of the anchoring flexibility of the TCR on the bead and the pMHC on the surface, the flow velocity resolves into a pulling force along the TCR/pMHC bond axis (Fig EV2) (Pierres et al, 1995; Robert et al, 2012). The duration of TCR/pMHC binding is determined by an automated image analysis algorithm that detects the duration of bead arrests. This automated workflow allowed us to perform a large number of experiments ( $N = 113$ ) using different flow velocities and different pMHC surface densities measuring a total of 13 different TCR/pMHC interactions.

We first confirmed that bead arrests were mediated by single bonds. In this regime, the density of arrested beads or the binding linear density (BLD) is expected to linearly increase with the density of pMHC on the surface and the survival distribution is expected to be independent of pMHC density (Pierres et al, 1995; Robert et al, 2012; Limozin et al, 2019) and we confirmed this for our data (Fig EV3). Moreover, the fitted zero-force off-rate from the LFC was similar to measurements using surface plasmon resonance (see next paragraph). We next confirmed that the BLD was similar between surfaces without pMHC or those with an irrelevant pMHC (Fig EV4) and that surfaces with a specific pMHC exhibited a larger BLD across different flow velocities (Fig EV5). As expected, at fast flow velocities we observe a more similar BLD because the short encounter duration between specific TCR and pMHC prevented binding and hence bead arrest (Limozin et al, 2019) and in the limit of very slow flow velocities it is not possible to distinguish bead arrest from the slow bead motion. These constraints limit the LFC to a range of flow velocities that translate into pulling forces between  $\sim 5$ –120 pN with

**Figure 2. Direct measurements of force sensitivity ( $x_{\beta}$ ) for the 1G4 and A6 TCRs reveal a negative correlation with  $K_D$  ( $k_{\text{off}}/k_{\text{on}}$ ).**

- A Schematic of the laminar flow chamber assay. All experiments were performed at physiological temperatures (37°C) and forces ( $< 120$  pN). The biotinylated pMHC is anchored to the streptavidin-coated surface by a flexible linker and the TCR contains a flexible linker with a his-tag that allows for coupling to the bead (see Fig EV2 for details).
- B Example of bead survival distributions for the 1G4 TCR binding NYE 9V. The survival probability at 1 s is shown as a dotted vertical line and is used to calculate the off-rate under force:  $-\ln(\text{survival at 1 s})/1$  s.
- C Off-rates under force obtained from (B) are fitted with Bell's model (solid line).
- D Off-rates under force for additional pMHCs interacting with the 1G4 TCR fitted to Bell's model (solid line).
- E Correlation of the dissociation constant ( $K_D$ ) measured previously by SPR and the extrapolated zero-force flow chamber off-rate ( $k_{\text{off}}^0$ ) from fitting Bell's model for the 1G4 TCR.
- F Correlation of the SPR dissociation constant ( $K_D$ ) with the fitted force sensitivity parameter ( $x_{\beta}$ ) for the 1G4 TCR.
- G Off-rates under force for pMHCs interacting with the A6 TCR fitted to Bell's model (solid line).
- H Correlation of the dissociation constant ( $K_D$ ) measured previously by SPR and the extrapolated zero-force flow chamber off-rate ( $k_{\text{off}}^0$ ) from fitting Bell's model for the A6 TCR.
- I Correlation of the SPR dissociation constant ( $K_D$ ) with the fitted force sensitivity parameter ( $x_{\beta}$ ) for the A6 TCR.

Data information: Error bars (SE) in E, F, H, I are obtained from the fit. The number of independent experiments performed on different days that were combined to produce the estimated off-rates is 7 (1G4/9V), 8 (1G4/6V), 8 (1G4/4E5E8E), 10 (1G4/3Y), 6 (1G4/4D), 9 (A6/Tax WT), 11 (A6/5F), 9 (A6/7Q), 8 (A6/7R), 8 (A6/5H). Source data are available online for this figure.

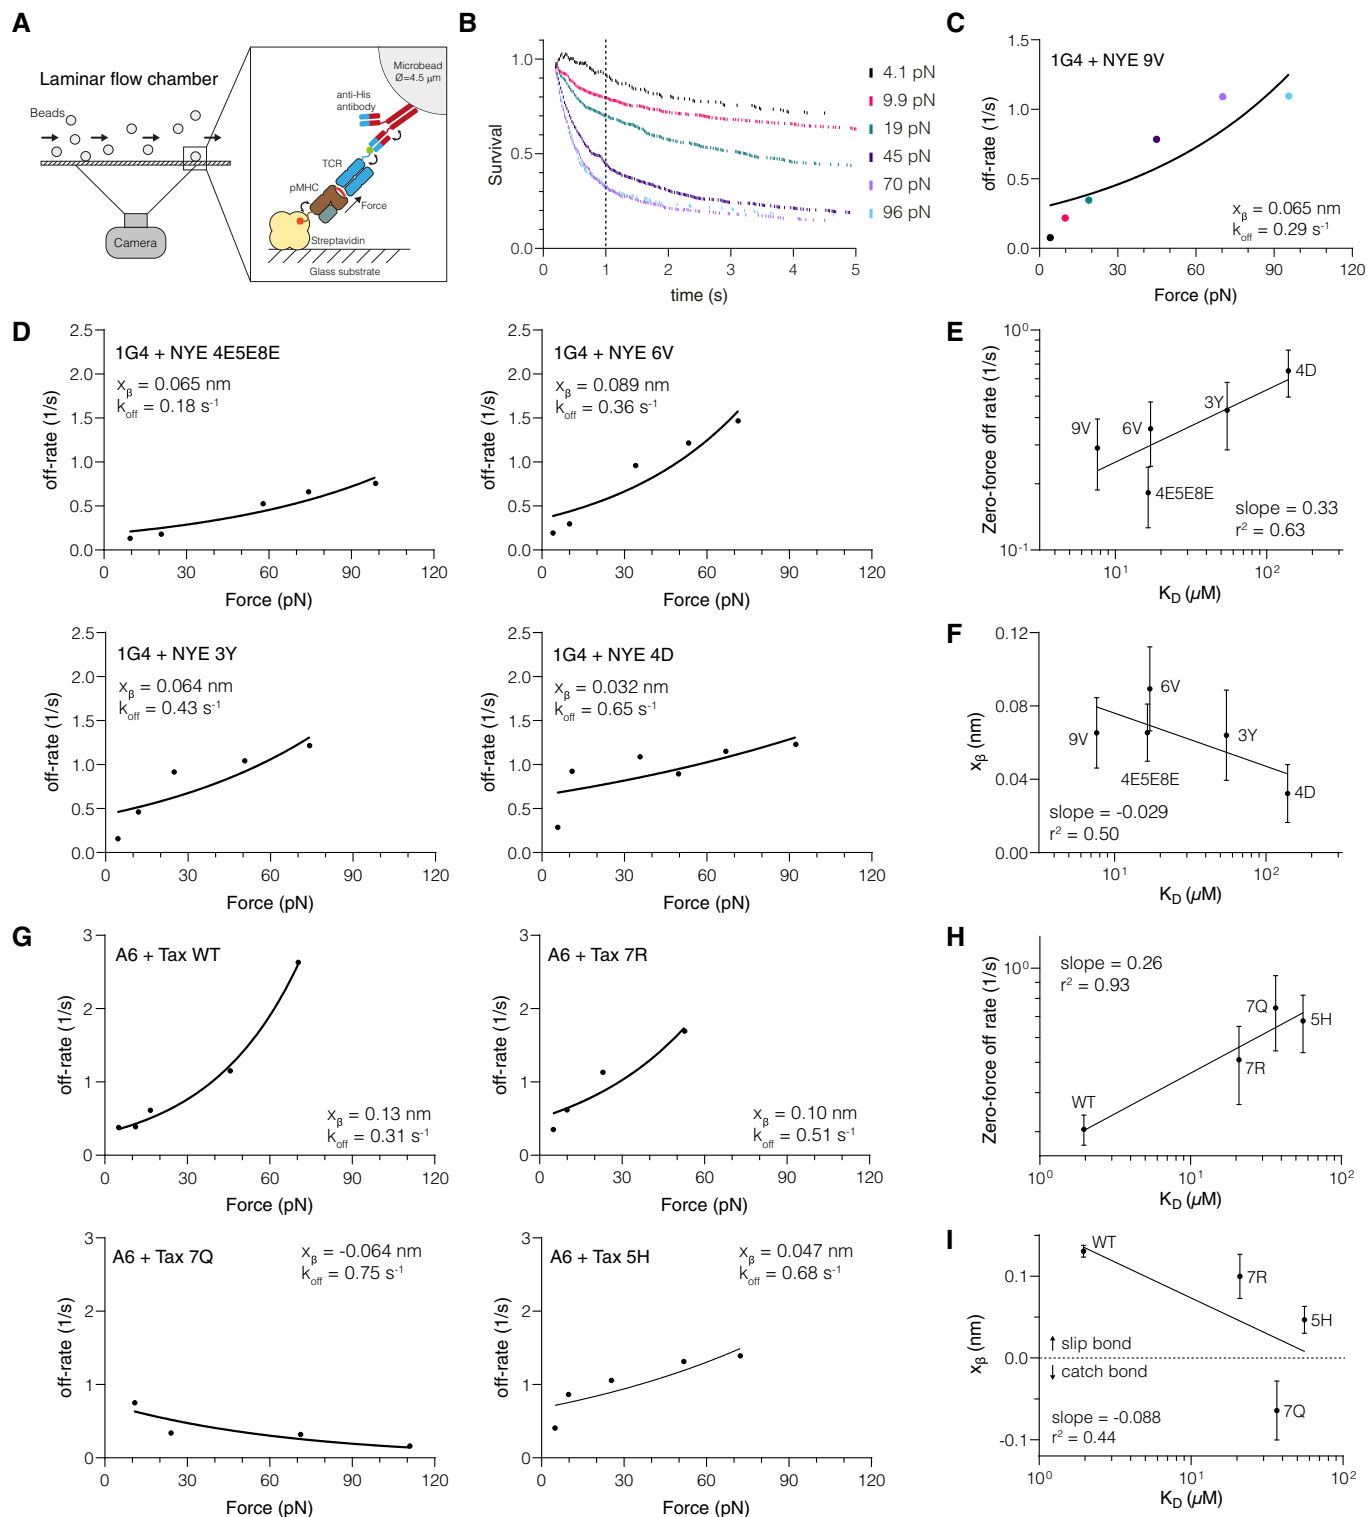

Figure 2.

the upper bound determined, in part, by the binding rate and strength of the specific TCR/pMHC interaction. Finally, survival distributions were generated using the duration of individual beads for each TCR/pMHC pair and corrected by the corresponding distribution of arrests without pMHC for each paired velocity. We focus on the first 5 s of the distribution because on longer timescales

measurement of bead arrest is often interrupted by a collision from a second bead.

We found that increasing force decreased survival for 1G4 binding the agonist 9V peptide from the NY-ESO-1 cancer testis antigen, which is indicative of a slip bond (Fig 2B). We calculated off-rates based on the survival fraction at 1 s as in our previous work (Robert

et al, 2012) and fit the data using Bell's model to determine the force sensitive and the zero-force off-rate (Fig 2C). The zero-force off-rate ( $k_{\text{off}}^0 = 0.29 \text{ s}^{-1}$ ) agreed with the published solution  $k_{\text{off}}$  obtained using SPR ( $0.33 \text{ s}^{-1}$ ) (Aleksic et al, 2010). We found that four additional ligands also formed slip bonds (Fig 2D), and as expected, the extrapolated zero-force off-rate correlated with the  $K_D$  values measured by SPR (Fig 2E). We used  $K_D$  values because they correlate with the solution off-rates and are easier to measure accurately, especially for weakly binding pMHCs.

We noted that the force sensitivity  $x_\beta$  varied between the pMHCs (Fig 2C and D) and, surprisingly, displayed a negative correlation with their  $K_D$  (Fig 2F). This means that an applied force disproportionately accelerates the off-rate of higher-affinity interactions. This can be observed by comparing the slopes on the off-rate curves (Fig 2D) where the higher-affinity 6V pMHC (top right panel) shows a much larger increase in off-rate with applied force than the lower affinity 4D pMHC (bottom right panel).

We next investigated whether the negative correlation could be observed for a different TCR. We found that the A6 TCR formed a slip bond with its wild-type Tax peptide from Human T-lymphotropic virus (HTLV), slip-bonds with three additional ligands (5F, 7R, 5H), and one catch bond (7Q) (Fig 2G). The estimated zero-force off-rate correlated with  $K_D$  measured by SPR (Fig 2H). As seen with the 1G4 TCR, we observed a negative correlation between the force sensitivity  $x_\beta$  and the  $K_D$  (Fig 2I).

The above analysis relied on estimating off-rates based on the survival fraction at 1 s as in our previous work (Robert et al, 2012). This method was used in part because the survival distributions did not follow a single exponential decay and this has been termed "history dependence of bond dissociation," which may suggest multiple bond states (Robert et al, 2012). To confirm the general validity of our results, we repeated the analysis by calculating the off-rate based on the survival fraction at 2 s or by directly fitting an exponential function that included a baseline plateau parameter to the survival distribution (Appendix Figs S1 and S2). We fit Bell's model to estimate the zero-force off-rate and the force sensitivity  $x_\beta$  (Appendix Figs S3 and S4) and found, as before, that they exhibited a positive and negative correlation, respectively, with  $K_D$  measured by SPR (Appendix Figs S5 and S6). Lastly, we also performed the analysis on the raw data prior to correcting for non-specific binding and again, found the same results (Appendix Figs S7–S12). Together, this suggests that our conclusions are robust to our data analysis methods.

We found three interactions (the 1G4 TCR binding 3A and 6T, and the A6 TCR binding 7T) that did not display canonical slip or catch bonds and could not be accurately fit with Bell's model (Appendix Fig S13). These interactions displayed the expected binding linear densities (Appendix Fig S3). Importantly, these bonds were slip bonds at forces thought to be more physiologically relevant ( $< 20 \text{ pN}$ ) (Göhring et al, 2021). Interestingly, 3A and 6T did display canonical slip and catch bonds, respectively, at  $25^\circ\text{C}$  (Robert et al, 2012), suggesting that some TCR/pMHC interactions can have a more complex unbinding pathway at  $37^\circ\text{C}$ .

We previously measured force sensitivity for the 1G4 TCR at  $25^\circ\text{C}$  using larger forces ( $> 30 \text{ pN}$ ) (Robert et al, 2012). In that study, which used a different definition of the force sensitivity parameter ( $F_0 = k_B T / x_\beta$ ), it was reported that no significant (linear) correlation was observed between  $k_{\text{off}}$  and  $F_0$ . However, when we

plot the force sensitivity using the definition in the present study ( $x_\beta$ ) against the log of  $k_{\text{off}}$ , we observed a striking negative correlation (Appendix Fig S14A). Therefore, our previous results are consistent with the present study.

We identified only one other study that measured force sensitivity and affinity. In that study,  $x_\beta$  was measured for a panel of nine antibodies binding fluorescein using atomic force microscopy (Schwesinger et al, 2000). Interestingly, a striking negative correlation is also observed between force sensitivity and off-rate, which we reproduce by directly plotting  $x_\beta$  over the log of  $k_{\text{off}}$  (Appendix Fig S14B). This suggests that a negative correlation between force sensitivity and off-rate (or  $K_D$ ) may be a general feature of antigen receptor interactions.

### Molecular dynamic simulation predicts a negative correlation between force sensitivity and off-rate

We next determined whether the negative correlation between  $k_{\text{off}}$  and  $x_\beta$  can also be observed using molecular dynamics simulations. We employed a structure-based coarse-grained model (Rózycki et al, 2014) where the C-terminus of the TCR $\beta$  was fixed in space and the C-terminus of the MHC was moved with constant speed ( $v$ ) to generate a response force ( $F$ ) on the TCR/pMHC interaction. Unbinding could readily be observed by  $F$  dropping from its maximal value to zero (Fig 3A). The maximum force ( $F_{\text{max}}$ ) was determined from 20 independent simulations (Fig 3B) and repeated for four different values of  $v$  (Fig 3C). Fitting the Bell-Evans formula (equation 2 in Schwesinger et al, 2000) provides estimates of  $k_{\text{off}}\tau$  and  $x_\beta$ , where  $\tau$  is the simulation timestep ( $\sim 1 \text{ ns}$ ) and is constant for all calculations.

To generate TCR/pMHC complexes with different affinities, we performed simulations using the 1G4 TCR/pMHC complex where all native contacts between the peptide and TCR were included or where certain contacts were excluded (Fig 3D). We fitted the Bell-Evans model and consistent with our experimental data, a plot of  $x_\beta$  over  $k_{\text{off}}$  from these simulations revealed a negative correlation with a dimensionless slope of  $-0.043$  (Fig 3E), which is similar to the experimental slope of  $-0.029$  observed for 1G4 (Fig 2F). We repeated the analysis for A6 TCR/pMHC complexes (Fig 3F) also finding a negative correlation with a dimensionless slope of  $-0.069$  (Fig 3G), which again was similar to the experimental slope of  $-0.088$  (Fig 2I).

Lastly, we repeated these simulations using two additional TCRs. When using the F24 TCR interacting with an HIV Gag-derived peptide presented on HLA-DR11 (Galperin et al, 2018), we found the same negative correlation with a dimensionless slope of  $-0.041$  (Appendix Fig S15A and B). When using the TK3 TCR interacting with an EBV peptide presented on HLA-B\*35:01 (Gras et al, 2010), we found a more modest negative slope of  $-0.024$  (Appendix Fig S15C and D).

Taken together, we performed a total of 400 independent molecular simulations across four different TCRs/pMHCs complexes that support a negative correlation between  $x_\beta$  and  $k_{\text{off}}$  with the quantitative slope varying across different TCR/pMHC complexes. As with our experimental data, this result implies that pulling forces will impair antigen discrimination by reducing fold-differences in off-rates because higher-affinity interactions will be more sensitive to force compared to lower-affinity interactions.

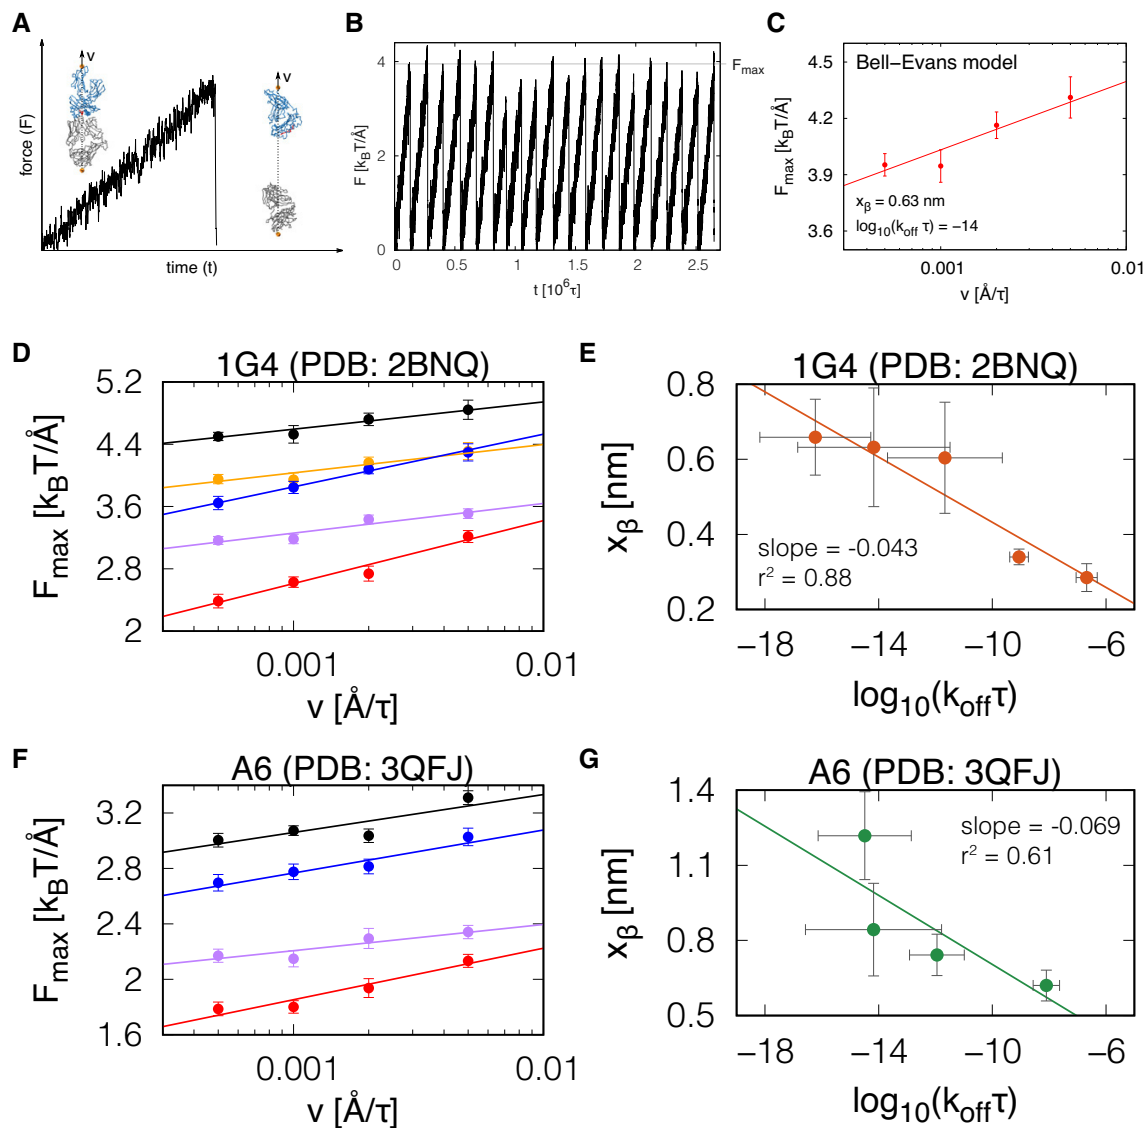

**Figure 3. Structure-based coarse-grained molecular dynamics simulations support a negative correlation between  $x_{\beta}$  and  $k_{off}$ .**

**A** The response force (F) on the TCR/pMHC interaction when the C-terminus of the MHC is pulled with constant velocity (v) and the C-terminus of the TCRβ is fixed in space. Insets: the TCR is shown in grey, the MHC in blue, and the peptide in red. The sites where the springs are attached are marked in orange. The direction of pulling is marked by a dashed line.

**B** A plot of F(t) from  $N = 20$  independent simulation trajectories with the same value of the pulling speed (v). The grey horizontal line indicates the average force (F<sub>max</sub>) at which the TCR-pMHC complex dissociates.

**C** The dependence of F<sub>max</sub> ( $N = 20$ ) on v from the simulations follows the Bell-Evans model (solid line), which produces estimates of  $k_{off}$  and  $x_{\beta}$ .

**D** The dependence of F<sub>max</sub> on v obtained from simulations of five complexes for the 1G4 TCR-pMHC complex (PDB: 2BNQ): (i) with all native contacts between the peptide and the TCR (black), (ii) without the native contacts between the peptide residues 4 to 8 and the TCR (orange), (iii) only with the native contacts between the peptide and the TCRα (blue), (iv) only with the native contacts between the peptide and the TCRβ (purple), and (v) with no native contacts between the peptide and the TCR (red) included in the coarse-grained model. Solid lines are the fit of the Bell-Evans model.

**E** The values of  $k_{off}$  and  $x_{\beta}$  from the fit of the Bell-Evans model to the simulation data shown in panel D. The solid line is a linear fit on log-transformed x-axis values.

**F** Analogous to panel D but for the A6 TCR-pMHC complex (PDB: 3QFJ). The colour code is as in panel D.

**G** The values of  $k_{off}$  and  $x_{\beta}$  from the fit of the Bell-Evans model to the simulation data shown in panel F. The solid line is a linear fit on log-transformed x-axis values.

Data information: Error bars in C, D, and F represent SEM of the  $N = 20$  independent simulations and error bars in E, G represent SEM from the least-square fit of the data in D, F, respectively.

Source data are available online for this figure.

### The OT-I TCR binds OVA pMHC with a low-affinity and an exceptionally fast off-rate

Previous studies used the biomembrane force probe to report a catch bond for the OT-I TCR binding its agonist OVA pMHC ligand (Liu *et al*, 2014, 2015). We confirmed this in our laminar flow chamber assay using the survival at 1 s to calculate off-rates (Appendix Figs S16 and S17A and B) and similar results were obtained when using survival at 2 s or when directly fitting an exponential to the data (Appendix Fig S18). Since the negative correlation between  $x_\beta$  and  $k_{\text{off}}$  predicts that lower-affinity interactions with fast off-rates are likely to be resistant to or even benefit from force, we considered whether the OT-I/OVA interaction may have an unusually low affinity and fast off-rate. While early studies reported high affinities and slow off-rates at 37°C for the OT-I/OVA interaction ( $k_{\text{off}} \sim 0.02 \text{ s}^{-1}$ ) (Rosette *et al*, 2001), more recent measurements reported lower affinities and faster off-rates, even though they were performed at 25°C (Stepanek *et al*, 2014; Liu *et al*, 2015). This discrepancy prompted us to repeat these measurements using an SPR protocol optimized for low affinities at 37°C (Pettmann *et al*, 2021).

We injected purified OT-I over a surface with low levels of purified OVA pMHC and obtained an affinity of  $K_D = 34 \mu\text{M}$  (Appendix Fig S17C–F), which is unusually weak for TCR interactions with an MHC-I restricted agonist (Cole *et al*, 2007). The dissociation phase produced very fast off-rates that were at the SPR instrument limit and therefore, we repeated the measurements using a different instrument based on Grating-Coupled Interferometry (GCI) (Appendix Fig S17F–H). Both GCI and SPR produced comparably fast off-rates of 4.3 and 5.7  $\text{s}^{-1}$ , respectively (Appendix Fig S17I). Using the measured off-rate and affinity, we calculated that the on-rate for this interaction was 0.13  $\mu\text{M}^{-1} \text{ s}^{-1}$  (Appendix Fig S17J), which is within the range obtained with other TCRs (Cole *et al*, 2007).

Our analysis shows that the OT-I/OVA interaction, which forms a catch bond, has an unusually fast off-rate for an agonist TCR/pMHC interaction (Cole *et al*, 2007), 13–17-fold faster than the 1G4/9V interaction (Aleksic *et al*, 2010). This is consistent with our findings that TCR/pMHC interactions with fast off-rates (lower-affinity) are more likely to be resistant to forces (weak slip bonds) or benefit from them (catch bonds).

### Enhanced antigen discrimination by adhesion interactions can be explained by “force-shielding” TCR/pMHC interactions

It is well established that engagement of the T-cell adhesion receptors CD2 (which binds CD58) and LFA-1 (which binds ICAM-1) improve the sensitivity of T cells to antigens (Huse, 2017; Siller-Farfán & Dushek, 2018; Zhu *et al*, 2019; preprint: Burton *et al*, 2021). Recently, we reported that this improvement in sensitivity was progressively lost as the antigen affinity was lowered and consequently, engagement of these receptors increased the ability of T cells to discriminate antigens (Pettmann *et al*, 2021) but the mechanism remains unclear.

To address this, we first modified the standard kinetic proofreading model by including the impact of force (Fig 4A). In the standard model, the duration of pMHC binding to the TCR, which critically determines whether binding is translated to a productive TCR

signal, is determined by the solution off-rate. Here, we were able to replace the solution off-rate with the predicted membrane off-rate ( $k_{\text{off}}^m$ ) using the force sensitivity relationship that we had measured for the 1G4 TCR (Fig 2F,  $x_\beta = -0.029 \log_{10}(K_D) - 0.11$ ). We found that reducing molecular forces from 100 to 10 pN increased differences in signalling TCRs between three test ligands (Fig 4B). This effect is illustrated when the concentration of ligand (P) required to produce a threshold level of TCR signal is plotted over the zero-force  $k_{\text{off}}$  (Fig 4C). It is evident that P increases faster for lower values of  $k_{\text{off}}$  compared to higher values under an applied force. Consequently, the model predicts that increasing force on the TCR/pMHC interaction decreases antigen sensitivity (Fig 4D) and reduces antigen discrimination (Fig 4E).

To understand how adhesion receptors impact the force on the TCR/pMHC interaction, we next fitted the modified model to data we previously generated (Pettmann *et al*, 2021). Briefly, primary human CD8<sup>+</sup> T cells expressing the 1G4 TCR were stimulated with eight antigens either alone or in combination with CD58 or ICAM-1, and the concentration of antigen required to elicit activation (P) was plotted against the solution affinity (Fig 4F). We fixed the number (N) and rate ( $k_p$ ) of each step to those we previously identified (Pettmann *et al*, 2021) to obtain a mechanical proofreading model with only two fitting parameters: the force applied on the TCR/pMHC interaction (F) and a quantity that is proportional to the threshold concentration of productively signalling TCRs ( $\lambda$ ). Intuitively, lower values of  $\lambda$  mean that a lower TCR signal is sufficient to activate a cellular response.

We first asked whether differences in force are sufficient to explain the changes in P for all antigens. To do this we fitted F while constraining  $\lambda$  to a single “global” value (Fig 4F, dashed line). We found that, while the fit qualitatively reproduced the data, in that ligation of CD2 or LFA-1 increased both antigen sensitivity and discrimination, it failed to quantitatively fit the data. Inspection of the fits suggests that force shielding by CD2 and LFA-1 (dashed lines) can fully account for their ability to enhance antigen discrimination (changes in slope) but only partially account for their ability to enhance antigen sensitivity (vertical shifts/changes in potency). When we also allowed  $\lambda$  to vary, we observed an excellent fit (Fig 4F, solid line) with reduced TCR/pMHC forces (Fig 4G) and reduced TCR signalling thresholds (Fig 4H) upon ligation of adhesion receptors.

In summary, these results suggest that force-shielding by CD2 and LFA-1 can fully account for their ability to improve antigen discrimination and partially account for their ability to enhance sensitivity, suggesting that sensitivity is further enhanced by processes, presumably signalling by CD2 and LFA-1, that amplify TCR signals.

## Discussion

We have used a modified form of Bell’s model to explore how molecular forces might impact antigen discrimination. This revealed that discrimination would be impaired by force if the sensitivity of TCR/pMHC interactions to force ( $x_\beta$ ) increases as  $k_{\text{off}}$  decreases (i.e. as their affinity increases). Using cell-free experiments, we showed that higher-affinity TCR/pMHC interactions are indeed more susceptible to force than lower-affinity interactions. In other words, we show that  $x_\beta$  is negatively correlated with  $k_{\text{off}}$ , such that low-affinity

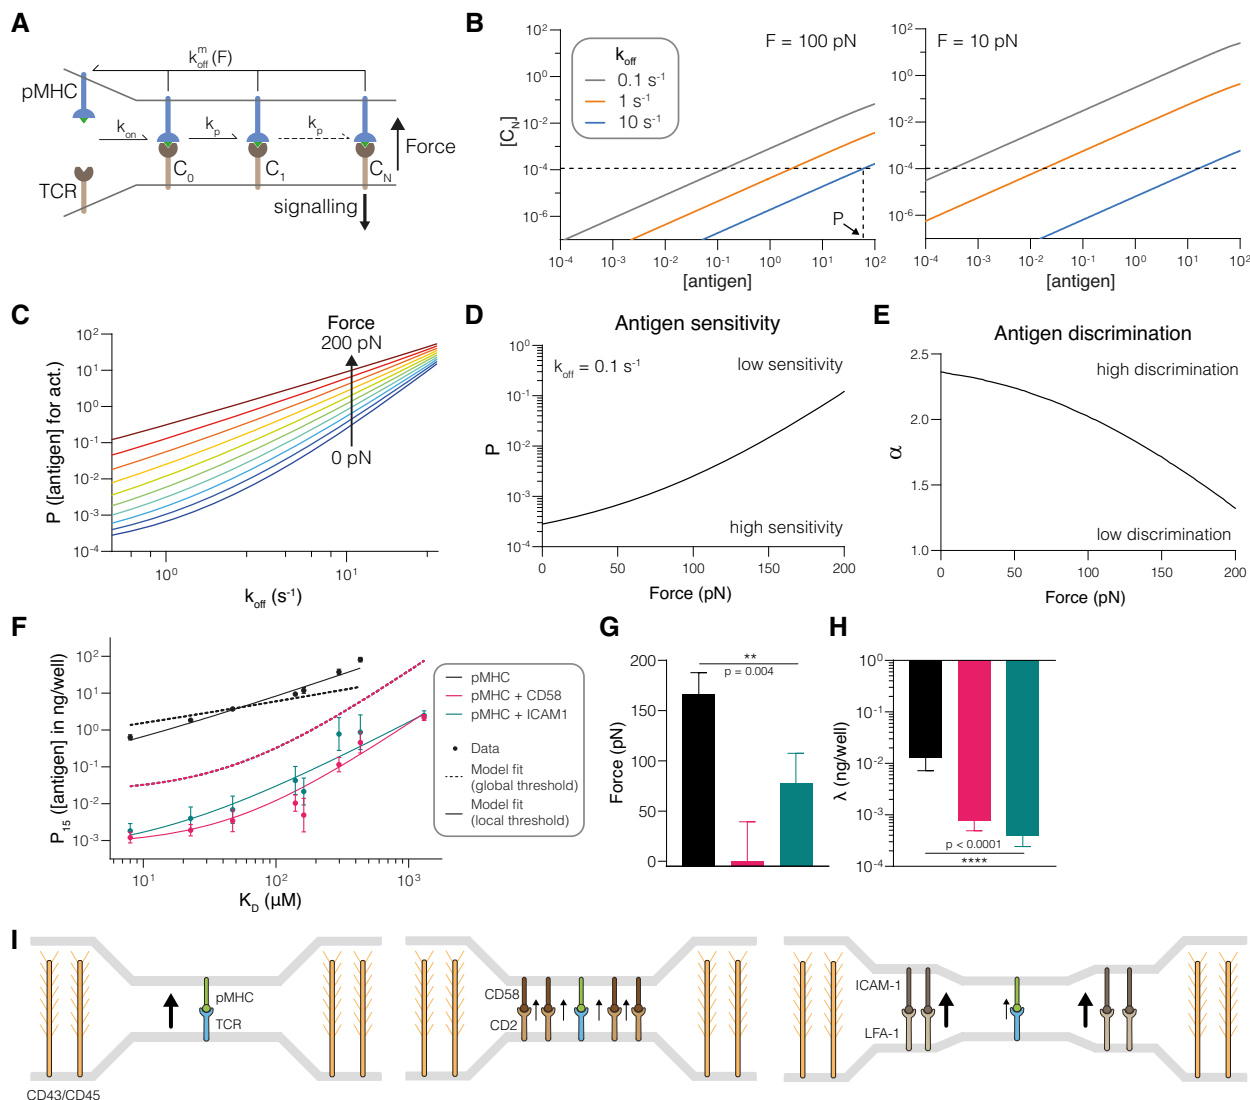

**Figure 4. The ability of adhesion receptors to enhance T-cell antigen discrimination and sensitivity can be explained by them shielding the TCR/pMHC interaction from mechanical force.**

- A Schematic of the kinetic proofreading model modified to allow molecular forces to impact the membrane off-rate ( $k_{off}^m$ ).
- B The concentration of productively signalling TCRs ( $C_N$ ) over the antigen concentration for antigens with the indicated zero-force off-rates ( $k_{off}$ ). Shown is the effect of forces at 100 pN (left) and 10 pN (right). The horizontal dashed line is the threshold value of  $C_N$  required for activation in the model ( $\lambda$ ). The vertical dashed line shows the antigen concentration ( $P$ ) required to elicit activation by the antigen with the largest value of  $k_{off}$ .
- C The antigen concentration required to elicit activation ( $P$ ) over  $k_{off}$  for the indicated molecular forces on the TCR/pMHC interaction.
- D Antigen sensitivity quantified as the value of  $P$  from (C) over the applied force for a higher-affinity antigen with  $k_{off} = 0.5 \text{ s}^{-1}$ .
- E Antigen discrimination quantified by the discrimination power ( $\alpha$ ) over the applied force. Discrimination power is defined as the ratio of the logarithm of the fold-change in  $P$  over the fold-change in  $k_{off}$  for a higher-affinity ligand ( $k_{off} = 0.5 \text{ s}^{-1}$ ) and a lower-affinity ligand ( $k_{off} = 10^{1.5} \text{ s}^{-1}$ ) from panel (C).
- F Experimental value of  $P$  (symbols) over antigen affinity fitted by the kinetic proofreading model with force (dashed and solid lines). The value of  $P$  is defined as the concentration of pMHC required for 15% upregulation of CD69 above baseline and is shown as the mean with SEM from 4 independent experiments. All experimental data are taken from fig 4 in (4).
- G The fitted value of the applied force with SEM.
- H The fitted value of  $\lambda$  with SEM.
- I Proposed mechanisms by which adhesion receptors can reduce pulling forces on TCR/pMHC interactions (black arrow). Molecular forces on individual TCR/pMHC interactions can be produced by multiple mechanisms, including a mismatch in size between the short TCR/pMHC interaction ( $\sim 14 \text{ nm}$ ) and larger surface molecules, such as CD43 and CD45 that extend 21–45 nm (left panel). These forces may be reduced by force-sharing with the CD2/CD58 adhesion molecules that span the same distance and can therefore closely colocalize (middle panel). Alternatively, the larger LFA-1/ICAM-1 adhesion interaction may reduce forces by acting as a diffusional barriers to maintain CD43 and CD45 further away from TCR/pMHC interactions, and tether and stabilize cellular processes such as microvilli, thereby reducing the forces imposed on all interactions within an area of close contact surrounded by LFA-1/ICAM interactions (right panel)

Data information: An F-test is used to produce a  $P$ -value for the null hypothesis that the applied force or  $\lambda$  is the same across the three conditions. All calculations (B–E) and data fitting (F–H) used  $N = 2.46$  and  $k_p = 2.15 \text{ s}^{-1}$  (average of CD58 and ICAM-1 conditions) taken from fig 5 in (4).

Source data are available online for this figure.



interactions are more likely to form catch bonds ( $x_{\beta} < 0$ ). Consistent with this, we show that the best-characterized catch bond (OT-I/OVA) has an unusually low affinity and the fastest  $k_{\text{off}}$  yet reported for an agonist TCR/pMHC interaction.

Using structure-based coarse-grained molecular dynamics simulations of four TCRs, including 1G4 and A6, we confirmed the negative correlation between  $x_{\beta}$  and  $k_{\text{off}}$ , suggesting that this may be a general structural feature of TCR/pMHC interaction. The large number of independent simulations required to generate a single  $x_{\beta}$  vs.  $k_{\text{off}}$  plot ( $\sim 100$ ) meant that it was not feasible to perform computationally intensive all-atom simulations. Moreover, they typically allow for only a few hundred nanoseconds of simulation, which is appreciably shorter than typical TCR/pMHC lifetimes under physiologically relevant forces. To obtain unbinding on the nanosecond timescale using all-atom simulations, other studies have imposed high pulling speeds that can lead to unphysiologically high rupture forces (Sibener *et al*, 2018; Wu *et al*, 2019). For example, Wu *et al* (Wu *et al*, 2019) have used pulling speeds of 0.1 nm/ns, which is 200 to 2000 times larger than those used in the present study. It will be important to reproduce our results using all-atom simulations when it becomes computationally feasible under physiological pulling speeds.

Our findings using purified TCR and pMHC in a cell-free system show that high-potency pMHC ligands that activate T cells usually form slip bonds. In contrast, assays using live T cells have found that all high-potency pMHC ligands formed catch bonds (Kim *et al*, 2009; Liu *et al*, 2014; Das *et al*, 2015; Wu *et al*, 2019). A plausible explanation for these differences is the additional effect of TCR signalling when using live cells. It has been shown that TCR triggering induces cellular responses that enhance TCR/pMHC binding and prolong half-life, such as coreceptor recruitment, TCR clustering, and changes in the cytoskeleton or membrane (Varma *et al*, 2006; Dushek & van der Merwe, 2014; Pielak *et al*, 2017). In the biomembrane force probe, initial TCR binding enhances subsequent binding events (Zarnitsyna *et al*, 2007) and CD8 recruitment induced by TCR triggering increases TCR/pMHC binding (Jiang *et al*, 2011). We suggest that engagement of activatory pMHC with TCR induces TCR signalling which in turn induces processes that enhance pMHC binding, generating catch bonds. This is plausible in BFP assays because the TCR/pMHC bond duration is measured multiple times using the same T cell, which allows TCR signalling induced by initial pMHC binding to enhance subsequent binding. Thus, the catch bond observed using live T cells may be a consequence of TCR triggering, accounting for correlation between catch bond behaviour and TCR triggering. In support of this, the magnitude of the catch bond was much lower when the same TCR/pMHC interaction was examined using purified TCR instead of native TCR on live T cells (Liu *et al*, 2015). Furthermore, high-affinity ligands for the 1G4 TCR displayed slip bonds using purified TCR (present study) and a catch bonds using the BFP with live T cells (Wu *et al*, 2019). In conclusion, these apparently contradictory results can be reconciled if the binding of agonist pMHC to TCR induces active processes that enhance pMHC binding, thereby generating effective catch bonds.

Why might TCR/pMHC interactions with a lower affinity/faster  $k_{\text{off}}$  be more resistant to force than higher affinity interactions? One intuitive explanation is that the contact interface will be less intimate with low versus high-affinity interactions. It follows that the notional distance between the energy minimum and the energy

barrier along the dissociation pathway would be shorter for lower affinity interactions. Thus,  $x_{\beta}$ , which has units of length and can be thought of as equivalent to this distance, will be shorter for low-versus high-affinity interactions. Assuming that the height of the energy barrier decreases less than this distance for lower-affinity interactions, shortening will make the slope up to the energy barrier steeper, and, since this slope can be considered to be equivalent to force, this implies greater force is needed to reach the barrier. While the unbinding pathway for protein/protein interactions is likely to be complex and varying, it seems reasonable that mutations within a given TCR/pMHC complex that increase or decrease the affinity would increase or decrease respectively, the intimacy of the contact interface and thus  $x_{\beta}$  explaining our experimentally observed negative correlation. In contrast, given the large structural diversity between TCR/pMHC binding interfaces (Rudolph *et al*, 2006), and the fact that TCRs do not encounter foreign agonist pMHC during their development, it is difficult to envisage a molecular explanation for how high-affinity interactions all form intrinsic catch bonds. Instead, our data suggest that catch bonds formed by agonists, such as OT-I/OVA, will have unusually fast  $k_{\text{off}}$  so that they can only function as agonists by forming a catch bond that sufficiently slows their  $k_{\text{off}}^m$  to induce TCR signals. The structural explanation for the  $x_{\beta}$ - $k_{\text{off}}$  relationship described above cannot easily explain catch bonds and why they may be more common with low-affinity interactions. One possible explanation is that lower affinity TCR/pMHC complexes possess more conformational flexibility within the binding interface, increasing the likelihood of conformational adjustments leading to new interactions during unbinding under force.

We have previously shown that the adhesion molecules CD2 and LFA-1 improve T-cell antigen discrimination. Here, we have found that the kinetic proofreading mechanism, when modified to include the effects of force, can explain the effect of CD2 and LFA-1 on antigen discrimination by their ability to shield the TCR/pMHC interaction from forces. This is readily explained in the case of CD2 because CD2/CD58 interactions span the same distance as the TCR/pMHC interaction. This size compatibility enables them to closely colocalize with individual TCR/pMHC interactions within close contacts and hence share forces (Fig 4I, left and middle panels). Indeed, modelling confirms that receptor/ligand interactions can share forces when co-localized on the nanometre scale (Pullen & Abel, 2017; Rózycki & Weikl, 2021). Although CD2 increases discrimination by the 1G4 TCR, a recent study suggests that it decreases discrimination by the OT-I TCR (Li *et al*, 2022). These data are consistent with our finding that, unlike the 1G4 TCR, the purified OT-I TCR forms catch bonds with its agonist pMHC. Thus, force-shielding by CD2 would accelerate dissociation of agonist pMHC from the OT-I TCR. We note that signalling by CD2 ( $\lambda$  in our model) can increase antigen potency irrespective of the slip or catch nature of the bond. The recent demonstration that the binding of CD2 to its ligand on the same cell can enhance T-cell activation by pMHC supports a role for CD2 signalling, since cis interactions would not provide force shielding of the TCR/pMHC interaction (Li *et al*, 2022). Taken together, this can explain why the net effect of CD2 on both the OT-I and 1G4 is to increase potency but with a different magnitude depending on affinity.

Given that the LFA-1/ICAM-1 interaction spans a greater distance than the TCR/pMHC interaction (Springer, 1990) and does not

intimately colocalize with it within the immunological synapse (Hashimoto-Tane *et al*, 2016), it cannot reduce TCR/pMHC forces by the same CD2/CD58 force shielding mechanism. Instead, we suggest that LFA-1/ICAM-1 interactions reduce force on a larger scale, by acting as a diffusional barrier to exclude large glycocalyx molecules such as CD43 and CD45 (Allard *et al*, 2012; Freeman *et al*, 2016), and through their ability to reduce T-cell mobility and/or stabilize lamellipodia and microvilli processes (e.g. Fig 4I, right panel). In support of this, LFA-1/ICAM-1 interactions have been shown to form “micro-adhesion” rings surrounding areas of TCR/pMHC engagement (Hashimoto-Tane *et al*, 2016). Furthermore, LFA-1/ICAM-1 interactions experience substantial forces (> 56 pN) at T-cell interfaces, and increasing their ability to withstand forces enhances antigen discrimination (Ma *et al*, 2022). Direct measurements of the effect of engaging adhesion receptors on the force experienced by the TCR at T-cell/APC interfaces are needed to test these predictions.

Our study has several limitations. First, the LFC assay cannot accurately apply forces below ~ 4 pN and therefore we cannot rule out catch bonds at forces below 4 pN. Second, forces were only applied along the normal TCR/pMHC binding axes, and therefore, we cannot rule out catch bonds with forces applied in other directions. It has been suggested that the TCR/pMHC interaction can be subjected to shear forces (Göhring *et al*, 2021). Third, we have used purified TCR $\alpha\beta$  domains whereas in T cells the TCR $\alpha\beta$  domains are intimately associated with CD3 signalling subunits. Therefore, it would be interesting to repeat the LFC assay using purified TCR-CD3 complex and/or to repeat the BFP assays using TCR-CD3 presented on membranes rather than live T cells.

In conclusion, we have shown that force sensitivity increases with affinity, which implies that force on the TCR/pMHC interaction impairs antigen discrimination. The fact an antibody/antigen interaction shows the same correlation suggests that this may be general feature of antigen receptors. Importantly, B-cell antigen recognition also occurs at cellular interfaces where mechanical forces are likely to play an important role (Natkanski *et al*, 2013). Given the critical role of T and B cell antigen discrimination, we suggest that force shielding is functionally important as it provides an environment where antigen receptors experience a consistent level of force. The fact that CD2 and LFA-1 are expressed on all T cells, and their ligands CD58 and ICAM-1 are ubiquitously expressed, makes them suitable for such roles.

## Materials and Methods

### Laminar flow chamber assay

Glass slides were rinsed twice in absolute ethanol then washed in a “piranha” solution composed of 70% H<sub>2</sub>SO<sub>4</sub>, 15% water and 15% H<sub>2</sub>O<sub>2</sub> for 10 min, then rinsed with 5 litres of deionized water. Glass slides were coated with poly-L-lysine (150–300 kDa, Sigma Aldrich, France) at 100 µg/ml in a 0.01 M phosphate solution, pH 7.4 for 10 min, then rinsed in PBS, then incubated with glutaraldehyde (2.5% in pH 9.5 0.1 M borate solution, Sigma Aldrich) for 10 min, then rinsed in PBS, then incubated in a 100 µg/ml biotinylated BSA solution in PBS (Sigma Aldrich), for 30 min, then rinsed in PBS, then incubated in a 10 µg/ml streptavidin solution in PBS (Sigma

Aldrich), then rinsed in PBS. Glass slides were then mounted in a home-made multi-channel thermo-regulated flow chamber device, forming nine independent chambers of 12 mm length and 2 × 0.250 mm<sup>2</sup> section. Each chamber was then filled with a biotinylated pMHC solution in PBS with 0.1% BSA at chosen concentration, using cascade dilution to deposit in our 9-chambers apparatus 8 different amounts of pMHC plus one chamber as a negative control. Microspheres (DynaM M-450 tosyl-activated, Thermo Fisher, France) were rinsed three time in a 0.1 M borate solution, then incubated in a 200 µg/ml solution of anti-6xHis-tag antibody (Bio-Rad, MCA1396, clone AD1.1.10, RRID: AB322084) overnight under constant agitation. Microspheres were rinsed three time in PBS/0.1% BSA then incubated prior to each experiment in a 200 µg/ml solution of 6xHis-tag TCR.

Flow chamber experiments were performed using our automaton based on a Arduino Mega 2560 card (Arduino, Italy). The device forming nine independent chambers on a common glass slide was thermo-regulated at 37°C by water circulation, set on an inverted microscope with a 10× lens (Leica, Germany) with a digital CCD camera (UEye, IDS Germany), and chamber entry was connected to the piping. For each independent chamber, the automaton performed cycles, each cycle being an experiment for a given shear flow. The automaton repeated cycles of microspheres agitation, microspheres injection in the chamber, launch of movie recording at 50 frames per seconds with M-JPEG on-the-fly compression, and flow at a given shear for 90 s. Shear value was automatically modified for each new cycle until all chosen shear conditions had been recorded. The chamber was manually disconnected and next chamber was connected, then automaton was re-launched. Raw data are in the form of movies of microspheres motion. A software suite written in Java as ImageJ plug-ins retrieves microspheres trajectories and then detects microspheres arrest events using a velocity threshold and record arrests number, arrests duration and distance travelled by sedimented microspheres.

Binding linear densities are calculated as the ratio of the number of arrests on the distance travelled by microspheres sedimented on the chamber surface. Specific binding densities are calculated by subtracting control linear binding density from assay linear binding density for a given shear condition. Duration of arrests was pooled for experiments sharing identical TCR and pMHC molecules, identical amount of pMHC on the surface and identical shear rate, to build survival curves of the arrests. Data points that did not have more events than the corresponding control experiment were excluded. Each TCR-pMHC bond was measured in 8 to 12 independent experiments. Single molecular bond observation was assessed using the usual flow chamber arguments: in an interval of deposited amounts of pMHC, linear binding density was increasing linearly from negative control value with the amount of deposited ligand; survival curves of bonds would not change in the same range of amounts of deposited pMHC, showing observation of similar binding events. For this binding density analysis, specific survival curves were calculated by subtracting, for each time step, the corresponding survival fraction of non-specific arrests measured in control experiments.

The TCR, pMHC and the concentrations that were used are as follows:

1G4/NYE 9V/SLLMWITQV/0.25 mg/ml, 1G4/NYE 3A/SLAMWITQV/1.25 mg/ml, 1G4/NYE 4E5E8E/SLLEEITEV/5.00 mg/ml,

1G4/NYE 6V/SLLMWVTQV/0.50 mg/ml, 1G4/NYE 3Y/SLYMWITQV/1.00 mg/ml, 1G4/NYE 4D/SLLDWITQV/0.50 mg/ml, 1G4/NYE 6T/SLLMWTTQV/1.00 mg/ml, A6/Tax WT/LLFGYPVYV/0.13 mg/ml, A6/Tax 5F/LLFGWPVYV/1.00 mg/ml, A6/Tax 7T/LLFGYPTYV/5.00 mg/ml, A6/Tax 7R/LLFGYPRYV/0.25 ug/ml, A6/Tax 7Q/LLFGYPQYV/1.25 mg/ml, A6/Tax 5H/LLFGHPVYV/1.00 mg/ml, OT-I/OVA/SIINFEKL/0.55 mg/ml.

### Data analysis

For each experiment, the survival and binding frequency was determined. Data from multiple experiments with small variations in velocity was pooled into the following velocity bins: [2, 10], [10, 20], [20, 40], [40, 60], [60, 80], [80, 120]  $\mu\text{m/s}$ . The average velocity was used to calculate the force. Data points were excluded from further analysis if the binding linear density of a sample was not different than the no pMHC control. The fold-change was calculated for each velocity category, data points with a geo. mean - geo. SEM of less than 1 were excluded (indicating that the binding events are mostly unspecific). Data were corrected for unspecific binding by subtracting no pMHC control data from the same velocity bin. The survival and binding frequency data was analysed using a custom Python pipeline (Python 3.9.7 AMD64, lmfit 1.0.3, matplotlib 3.4.3) and GraphPad Prism 9.4.1 (GraphPad Software). Experiments with less than 15 events in the interval (1 s, 2 s) were excluded. We used 3 different approaches to analyse the data. For each time point with at least one recorded event, the survival fraction was calculated. To calculate off-rates, we determined the survival fraction at 1 s and 2 s:  $k_{\text{off}} = (-\ln [s(t)])/t$ . In the rare cases where there was no event at exactly 1 s or 2 s, we used a subsequent event. Lastly, we fit a 1-phase exponential curve with 3 free parameters to the first 5 s of the corrected survival data:  $s(t) = (A - B) \exp(-k_{\text{off}} t) + B$ , where  $t$  is the time in seconds,  $B$  the baseline plateau and  $A$  the amplitude.

We used the resulting off-rates to fit Bell's model (24) to each TCR/pMHC where visual inspection indicated that the data would follow such an exponential model:  $k_{\text{off}}(F) = k_{\text{off}}^0 \exp(Fx_{\beta}/k_{\text{B}}T)$ , where  $F$  is the force in pN,  $k_{\text{off}}^0$  the zero-force off-rate ( $\text{s}^{-1}$ ; fitted parameter),  $x_{\beta}$  the force sensitivity (nm; fitted parameter),  $k_{\text{B}}$  the Boltzmann constant (0.0138 pN nm/K), and  $T$  the temperature (310.15 K).

### Protein expression and purification

Soluble OT-I TCR construct consisted of the murine variable OT-I domain and the human constant domain truncated above the trans-membrane domain with an artificial interchain disulphide. Soluble 1G4 TCR (no artificial disulphide) and A6 TCR (with an artificial disulphide) were similarly truncated above the trans-membrane domain (TRAC residue 93, TRBC2 residue 129). All TCRs contained a 6xHis-tag on one chain to allow immobilization on beads for force experiments. TCR  $\alpha$  and  $\beta$  chains were expressed in BL21 (DE3)-RIPL *Escherichia coli* cells (Agilent Technologies) following induction with 0.15 mM IPTG. Inclusion bodies were isolated by disrupting cells with BugBuster (Merck) according to the manufacturer's instructions. Proteins were stored at  $-80^{\circ}\text{C}$  until use. TCRs were refolded by adding 15 mg (OT-I) or 30 mg (1G4 or A6) of each chain dropwise in 1 L cold refolding buffer (0.15 M Tris-HCl pH 8.0, 3 M

urea, 0.2 M Arg-HCl, 0.5 mM EDTA), followed by dialysis for 3 days in 10 L dialysis buffer (10 mM Tris-HCl pH 8.5), with a buffer change after day 1. After dialysis, the protein was filtered and purified using anion-exchange chromatography (HiTrap Q column [GE Healthcare]) with a NaCl gradient, followed by concentration and purification by size exclusion chromatography (Superdex 200 column [GE Healthcare]) in HBS-EP (0.01 M HEPES pH 7.4, 0.15 M NaCl, 3 mM EDTA, 0.005% v/v Tween20). TCR purity was checked by SDS-PAGE and concentrations were measured with a Nanodrop spectrophotometer (Thermo Fisher). Purified TCR were stored at  $4^{\circ}\text{C}$  and used for SPR and GCI measurements withing 24 h (OT-I) or 1 month (1G4 and A6) after purification to avoid aggregation.

Soluble class I pMHCs bound to OVA peptide (OVA257–264; SIINFEKL) or A2 variant (SAINFEKL) were refolded and biotinylated by the NIH protein facility. We used mouse H-2Kb heavy chain and human beta-2 microglobulin, biotinylated on the C terminal of the heavy chain. pMHCs were aliquoted and stored at  $-80^{\circ}\text{C}$  until use.

NYE (NYE-ESO157–165) and Tax (HTLV-1 Tax11–19) class I pMHCs were refolded in-house. The heteroclitic 9V variant was used as index peptide for the 1G4 TCR, rather than the wild-type 9C, due to its improved stability on MHC (Chen *et al.*, 2005). Soluble human HLA-A\*0201 heavy chain (UniProt residues 25–298) with a C-terminal AviTag/BirA recognition sequence and human beta-2 microglobulin were expressed in *Escherichia coli* and isolated from inclusion bodies. Trimer was refolded by consecutively adding peptide,  $\beta$ 2M and heavy chain into refolding buffer and incubating for 2–3 days at  $4^{\circ}\text{C}$ . Protein was filtered, concentrated using centrifugal filters, biotinylated (BirA biotin-protein ligase bulk reaction kit [Avidity, USA]) and purified by size exclusion chromatography (Superdex 75 column [GE Healthcare]) in HBS-EP. Purified protein was aliquoted and stored at  $-80^{\circ}\text{C}$  until use.

Soluble extracellular domain (ECD) of human CD58 (UniProt residues 29–204 + AviTAG + 6xHis) and human CD86 (UniProt residues 24–238 + AviTAG + 6xHis) were produced in Freestyle 293F suspension cells (Thermo Fisher) according to the manufacturer's instructions. Ligands were biotinylated by co-transfection (1:10) of a secreted BirA-encoding plasmid (pTT3-BirA-FLAG) and adding 100  $\mu\text{M}$  D-biotin to the medium, as described previously (Parrott & Barry, 2001). All supernatants were 0.45  $\mu\text{m}$  filtered and 100  $\mu\text{m}$  PMSF was added. Proteins were purified using standard Ni-NTA agarose columns. Proteins were further purified by size exclusion chromatography (Superdex 75 or 200 column [GE Healthcare]) in HBS-EP; purified proteins were aliquoted and stored at  $-80^{\circ}\text{C}$  until use.

### Surface plasmon resonance

TCR-pMHC interactions were analysed on a Biacore T200 instrument (GE Healthcare Life Sciences) at  $37^{\circ}\text{C}$  and a flow rate of 10  $\mu\text{l}/\text{min}$ . Running buffer was HBS-EP. Streptavidin was coupled to CM5 sensor chips using an amino coupling kit (GE Healthcare Life Sciences) to near saturation, typically 10,000–12,000 response units (RU). Biotinylated pMHCs (47 kDa) were injected into the experimental flow cells (FCs) for different lengths of time to produce desired immobilization levels (typically 500–1,500 RU), which were matched as closely as feasible in each chip. Usually, FC1 was a reference for FC2–FC4. Biotinylated CD58 ECD (24 kDa + 25 kDa glycosylation) was immobilized in FC1 at a level matching those of

pMHCs. In some experiments, another FC was used as a reference. Excess streptavidin was blocked with two 40 s injections of 250  $\mu\text{M}$  biotin (Avidity). Before injections of soluble 1G4 or A6 TCR (51 kDa), the chip surface was conditioned with 8 injections of the running buffer. Dilution series of TCRs were injected simultaneously in all FCs; the duration of injections (30–70 s) was the same for conditioning and TCR injections. After every 2–3 TCR injections, buffer was injected to generate data for double referencing. After the final TCR injection and an additional buffer injection, W6/32 antibody (10  $\mu\text{g}/\text{ml}$ ; BioLegend; Lot: B233942) was injected for 10 min.

TCR steady-state binding was measured  $> 10$  s post-injection. In addition to subtracting the signal from the reference FC with immobilized CD58 (single referencing), all TCR binding data were double-referenced vs. the average of the closest buffer injections before and after TCR injection. This allows to exclude small differences in signal between flow cells (e.g. drifts). TCR binding versus TCR concentration was fitted with the following model:  $B = B_{\text{max}} [\text{TCR}] / (K_D + [\text{TCR}])$ , where  $B$  is the response/binding,  $B_{\text{max}}$  the maximal binding (this parameter is either kept free or is fixed with the W6/32 derived  $B_{\text{max}}$ ), and  $[\text{TCR}]$  the injected TCR concentration. Maximal W6/32 binding ( $R_{\text{max}}$ ) was used to generate the empirical standard curve and to infer the  $B_{\text{max}}$  of TCRs from the standard curve.  $R_{\text{max}}$  was derived by fitting the W6/32 binding data after double referencing with the following, empirically chosen, model:  $R = R_{\text{max}} t / (K_t + t)$ , where  $t$  is time (s),  $R$  the sensogram response after single referencing, and  $K_t$  a nuisance parameter. The empirical standard curve only contained data where the ratio of the highest concentration of TCR to the fitted  $K_D$  value (obtained using the standard method with  $B_{\text{max}}$  fitted) was 2.5 or more. This threshold ensured that the binding response curves saturated so that only accurate measurements of  $B_{\text{max}}$  were included. All interactions were fit using both the fitted and constrained  $B_{\text{max}}$  method. For constrained  $K_D$  above 20  $\mu\text{M}$  we reported the constrained  $K_D$ , otherwise we use the  $B_{\text{max}}$  fitted  $K_D$ . SPR data were analysed using GraphPad Prism 8 and 9 (GraphPad software) or using a custom Python script (Python v3.7 and lmfit v0.9.13).

### Surface plasmon resonance and grating-coupled interferometry experiments for OT-I TCR

Binding properties of OT-I TCR interaction with OVA were measured by SPR on a Biacore S200 and T200 (GE Healthcare Life Sciences) using a CM5 sensor chip and by GCI on the WAVEsystem (Creoptix) with a 4PCP sensor chip. HBS-EP was used as running buffer and all measurements were performed at 37°C. For protein immobilization, the sensor chip was saturated with streptavidin using an amine coupling kit (GE Healthcare Life Sciences). Biotinylated pMHCs were immobilize at various levels (100–300 RU for kinetics, 1,000–2,000 RU for affinity measurements). CD86 with matching immobilization levels were used as reference protein. Excess streptavidin was blocked with two 40 s injections of 500  $\mu\text{M}$  biotin (Avidity), and the sensor was conditioned with at least eight injections of running buffer. TCR concentrations used varied between 50–150  $\mu\text{M}$ .

Binding affinities were measured by equilibrium binding on a T200 Biacore instrument. TCR was injected at increasing concentrations at 30  $\mu\text{l}/\text{min}$  with flow path 1-2-3-4. Buffer was injected after

every 2–3 TCR injections.  $K_D$  values were obtained by fitting a 1:1 Langmuir binding model ( $R_{\text{Ueq}} = R_{\text{Umax}} [\text{TCR}] / (K_D + [\text{TCR}])$ ) to double-referenced equilibrium RU values.

For kinetic measurements by SPR we used a Biacore S200. Different TCR concentrations were injected at a flow rate of 30  $\mu\text{l}/\text{min}$ . To minimize diffusion artifacts, TCR was injected separately in flow path 1–2 and 3–4. We obtained  $k_{\text{off}}$  by fitting a mono-exponential to double-referenced dissociation curves.

For kinetic measurements by GCI, we used a Creoptix waveRAPID. A single TCR concentration was injected multiple times using different length pulses for a total duration of 5 s, followed by a 50 s dissociation phase. To calibrate how the analyte (TCR) concentration changes over time during pulse injection, 0.5% DMSO is injected. Flow rate was set to of 100  $\mu\text{l}/\text{min}$  per flow cell. We obtained  $k_{\text{off}}$  by fitting a mono-exponential to double-referenced dissociation curves.

### Coarse-grained molecular dynamics simulations

We have used an implicit-solvent coarse-grained structure-based model in which amino acid residues are represented by single beads (Różycki *et al.*, 2014). The beads are tethered together into chains by harmonic springs. Non-local interactions between the beads are introduced on the basis of the PDB structure of the protein complex under study. Specifically, interactions between the beads that form contacts in the PDB structure of the protein complex are described by the Lennard-Jones potential. Interactions between the beads that do not form contacts in the PDB structure are purely repulsive and short-ranged. Disulphide bonds are captured by harmonic springs between the specified Cys beads. Importantly, the amino acid contacts in PDB structures are identified using an overlap criterion applied to the coordinates of all heavy atoms in the structures. The pairs of amino acid residues that are very close sequentially, that is  $(i, i + 1)$  and  $(i, i + 2)$ , are excluded from the set of contacts in the PDB structure. A detailed description of the coarse-grained structure-based model is given in (Różycki *et al.*, 2014).

As input to our simulations, we used the PDB structures of the 1G4 and A6 TCR-pMHC complexes with the PDB codes 2BNQ and 3QFJ, respectively. We considered five constructs of pMHC in complex with the 1G4 TCR, where (i) all contacts between the peptide and the TCR identified in the PDB structure (PDB code: 2BNQ) were included in the coarse-grained model, (ii) contacts between the peptide residues 4 to 8 and the TCR identified in the PDB structure were excluded from the coarse-grained model, (iii) only contacts between the peptide and the TCR $\alpha$  identified in the PDB structure were taken into account in the coarse-grained model, (iv) only contacts between the peptide and the TCR $\beta$  identified in the PDB structure were taken into account in the coarse-grained model, and (v) no contacts between the peptide and the TCR identified in the PDB structure were included in the coarse-grained model. We also studied four constructs of pMHC in complex with the A6 TCR, where (i) all contacts between the peptide and the TCR identified in the PDB structure (PDB code: 3QFJ) were included in the coarse-grained model, (ii) only contacts between the peptide and the TCR $\alpha$  identified in the PDB structure were taken into account in the coarse-grained model, (iii) only contacts between the peptide and the TCR $\beta$  identified in the PDB structure were taken into account in the coarse-grained model, and (iv) no contacts between the peptide and

the TCR identified in the PDB structure were included in the coarse-grained model.

We performed molecular dynamics simulations of the coarse-grained model using the Langevin thermostat. All of the simulations were started from native states corresponding to the PDB structures. Stretching of the TCR-pMHC complexes was implemented by attaching harmonic springs to two beads: the first one to the C-terminus of the TCR $\beta$  and the second one to the C-terminus of the MHC. The first of the springs was fixed in space and the second one was moved with a constant speed  $v$ . We performed the simulations with  $v$  ranging from 0.0005 to 0.005 Å/t, where the time unit  $t$  is estimated to be of the order of 1 ns (Szymczak & Cieplak, 2006). To prevent unfolding of the individual chains within the TCR-MHC complexes, we replaced the intramolecular contacts by harmonic springs. The inter-molecular contacts, however, were still described by the Lennard-Jones potentials, as previously introduced (Różycki *et al*, 2014). This modification resulted in  $F(t)$  traces with single peaks (Fig 3A and B) that were identified to coincide with TCR-pMHC dissociation events. We monitored the response force  $F$  acting on the pulling spring (Fig 3A) and determined the average force  $F_{\text{max}}$  at which the TCR-pMHC complexes break apart. The average was obtained from 20 independent trajectories (Fig 3B). The dependence of  $F_{\text{max}}$  on  $v$  follows the Bell-Evans formula (Schwesinger *et al*, 2000):  $F = (k_{\text{B}}T / x_{\beta}) \ln (x_{\beta} \kappa v / (k_{\text{B}}T k_{\text{off}}))$ , which yields the values of parameters  $k_{\text{off}}$  and  $x_{\beta}$  (Fig 3C). Here,  $k_{\text{B}}$  is the Boltzmann constant,  $T$  is the absolute temperature, and  $\kappa = 0.12 k_{\text{B}}T / \text{Å}^2$  is the stiffness of the harmonic springs attached to the C-termini of MHC and TCR $\beta$  (the product of  $v$  and  $\kappa$  equals to the loading rate).

### Kinetic proofreading with molecular forces

All calculations in Fig 4 were performed with the kinetic proofreading model modified to include the membrane off-rate under force. At steady-state, the concentration of signalling TCR in state  $N$  is calculated to be,  $C_N = (1 + k_{\text{off}}^m(F)/k_p)^{-N} C_T$  where,  $C_T = (1/2) (L_0 + R_0 + k_{\text{off}}^m(F)/k_{\text{on}} - ((L_0 + R_0 + k_{\text{off}}^m(F)/k_{\text{on}})^2 - 4L_0R_0)^{1/2})$ . In this model,  $L_0$  and  $R_0$  are the total concentration of pMHC and TCR, respectively,  $k_{\text{on}}$  is the on-rate and  $k_{\text{off}}^m(F)$  is the membrane off-rate under force ( $F$ ). We used the empirical relationship determine for the 1G4 TCR for all calculations (Fig 2F),  $k_{\text{off}}^m(F) = k_{\text{on}}K_D \exp((-0.029 \log_{10}(K_D) - 0.11)F/4.2797)$ , where  $k_{\text{on}}$  was taken to be  $0.0447 \mu\text{M}^{-1} \text{s}^{-1}$ , which is the average  $k_{\text{on}}$  value for the subset of pMHCs where kinetic parameters were available (Pettmann *et al*, 2021). We fixed the value of  $N$  to 2.46 and  $k_p$  to  $2.15 \text{s}^{-1}$  to the value we obtained for the plate data when providing adhesion ligands (fig 5 in Pettmann *et al*, 2021). Potency ( $P$ ) was defined as the concentration of pMHC ( $L_0$ ) required to achieve a value of  $C_N$  of  $10^{-4}$ . Antigen sensitivity was defined as the value of  $P$  for the highest affinity antigen and antigen discrimination was defined as the logarithm of the fold-change in  $P$  over the logarithm of the fold-change in  $k_{\text{off}}$  for the highest affinity ligand over the lowest affinity ligand in Fig 4C.

To directly fit the model to experimental potency data, we solved for the concentration of pMHC required to obtain a threshold value of  $C_N$  (see Pettmann *et al*, 2021 for complete derivation),  $P = \lambda + N \log(1 + k_{\text{off}}^m(F)/k_p)$ , where  $\lambda$  is proportional to the threshold value

of  $C_N$ ,  $N$  is the number of proofreading steps,  $k_p$  is the rate of each step, and  $k_{\text{off}}^m(F)$  is defined above. In this fit, the only free parameters were  $F$  and  $\lambda$ . We fit the model to the plate data (pMHC alone, pMHC + CD58, and pMHC + ICAM-1) using Prism (GraphPad) using a different value of  $F$  for each condition (local force) and either a single value of  $\lambda$  (global threshold) or a different value of  $\lambda$  for each condition (local threshold).

## Data availability

The molecular dynamics data of this article are available in the open research data repository Edmond at <http://doi.org/10.17617/3.2VLJ6X>

**Expanded View** for this article is available [online](#).

### Acknowledgements

We thank Edward A. FitzGerald for technical assistance with GCI and Jun Allard for discussion on adhesion receptor mechanics. We thank Bernhard Knapp, Dheeraj Prakaash, and Antreas Kalli for initial discussions on molecular dynamics simulations. The work was funded by a Wellcome Trust Senior Fellowship in Basic Biomedical Sciences (207537/Z/17/Z to OD), a Wellcome Trust PhD Studentship in Science (203737/Z/16/Z to JP), and by the National Science Centre of Poland (2021/40/Q/NZ1/00017 to BR). This research was funded in whole, or in part, by the Wellcome Trust [207537/Z/17/Z]. For the purpose of Open Access, the author has applied a CC BY public copyright licence to any Author Accepted Manuscript version arising from this submission.

### Author contributions

**Johannes Pettmann:** Conceptualization; data curation; formal analysis; investigation; visualization; methodology; writing – original draft; writing – review and editing. **Lama Awada:** Data curation; investigation; formal analysis; methodology; writing – original draft; writing – review and editing.

**Bartosz Różycki:** Formal analysis; investigation; visualization; data curation; methodology; writing – review and editing. **Anna Huhn:** Data curation; formal analysis; investigation; writing – review and editing. **Sara Faour:** Data curation; formal analysis; investigation.

**Mikhail Kutuzov:** Data curation; formal analysis; investigation; writing – review and editing. **Laurent Limozin:** Investigation; writing – review and editing. **Thomas R Weikl:** Formal analysis; investigation; writing – review and editing. **P Anton van der Merwe:** Supervision; investigation; writing – original draft; writing – review and editing. **Philippe Robert:** Conceptualization; data curation; formal analysis; supervision; funding acquisition; investigation; visualization; methodology; writing – original draft; project administration; writing – review and editing.

**Omer Dushek:** Conceptualization; supervision; funding acquisition; investigation; visualization; writing – original draft; project administration; writing – review and editing.

**Disclosure and competing interest statements**

The authors declare that they have no conflict of interest.

**References**

Aleksic M, Dushek O, Zhang H, Shenderov E, Chen J-L, Cerundolo V, Coombs D, van der Merwe PA (2010) Dependence of T cell antigen recognition on T cell receptor-peptide MHC confinement time. *Immunity* 32: 163–174

- Allard JF, Dushek O, Coombs D, van der Merwe PA (2012) Mechanical modulation of receptor-ligand interactions at cell-cell interfaces. *Biophys J* 102: 1265–1273
- Bell G (1978) Models for the specific adhesion of cells to cells. *Science* 200: 618–627
- Burton J, Siller-Farfán JA, Pettmann J, Salzer B, Kutuzov M, van der Merwe PA, Dushek O (2021) Inefficient exploitation of accessory receptors reduces the sensitivity of chimeric antigen receptors. *bioRxiv* <https://doi.org/10.1101/2021.10.26.465853> [PREPRINT]
- Cai E, Marchuk K, Beemiller P, Beppler C, Rubashkin MG, Weaver VM, Gérard A, Liu T-L, Chen B-C, Betzig E et al (2017) Visualizing dynamic microvillar search and stabilization during ligand detection by T cells. *Science* 356: eaal3118
- Chang VT, Fernandes RA, Ganzinger KA, Lee SF, Siebold C, McColl J, Jönsson P, Palayret M, Harlos K, Coles CH et al (2016) Initiation of T cell signaling by CD45 segregation at 'close contacts'. *Nat Immunol* 17: 574–582
- Chen J-L, Stewart-Jones G, Bossi G, Lissin NM, Wooldridge L, Choi EML, Held G, Dunbar PR, Esnouf RM, Sami M et al (2005) Structural and kinetic basis for heightened immunogenicity of T cell vaccines. *J Exp Med* 201: 1243–1255
- Cole DK, Pumphrey NJ, Boulter JM, Sami M, Bell JI, Gostick E, Price DA, Gao GF, Sewell AK, Jakobsen BK (2007) Human TCR-binding affinity is governed by MHC class restriction. *J Immunol* 178: 5727–5734
- Colin-York H, Javanmardi Y, Skamrahl M, Kumari S, Chang VT, Khuon S, Taylor A, Chew TL, Betzig E, Moeendarbary E et al (2019) Cytoskeletal control of antigen-dependent T cell activation. *Cell Rep* 26: 3369–3379
- Das DK, Feng Y, Mallis RJ, Li X, Keskin DB, Hussey RE, Brady SK, Wang JH, Wagner G, Reinherz EL et al (2015) Force-dependent transition in the T-cell receptor  $\beta$ -subunit allosterically regulates peptide discrimination and pMHC bond lifetime. *Proc Natl Acad Sci U S A* 112: 1517–1522
- Dushek O, van der Merwe PA (2014) An induced rebinding model of antigen discrimination. *Trends Immunol* 35: 153–158
- Dushek O, Aleksic M, Wheeler R, Zhang H, Cordoba S, Peng Y, Chen J, Cerundolo V, Dong T, Coombs D et al (2011) Antigen potency and maximal efficacy reveal a mechanism of efficient T cell activation. *Sci Signal* 4: ra39
- Feng Y, Brazil KN, Kobayashi E, Mallis RJ, Reinherz EL, Lang MJ (2017) Mechanosensing drives acuity of  $\alpha\beta$  T-cell recognition. *Proc Natl Acad Sci U S A* 114: E8204–E8213
- Freeman SA, Goyette J, Furuya W, Woods EC, Bertozzi CR, Bergmeier W, Hinz B, Merwe PAVD, Das R, Grinstein S (2016) Integrins form an expanding diffusional barrier that coordinates phagocytosis. *Cell* 164: 128–140
- Galperin M, Farenc C, Mukhopadhyay M, Jayasinghe D, Decroos A, Benati D, Tan LL, Ciacchi L, Reid HH, Rossjohn J et al (2018) CD4<sup>+</sup> T cell-mediated HLA class II cross-restriction in HIV controllers. *Sci Immunol* 3: 687
- Göhring J, Kellner F, Schrangl L, Platzer R, Klotzsch E, Stockinger H, Huppa JB, Schütz GJ (2021) Temporal analysis of T-cell receptor-imposed forces via quantitative single molecule fret measurements. *Nat Commun* 12: 1–14
- Govern CC, Paczosa MK, Chakraborty AK, Huseby ES (2010) Fast on-rates allow short dwell time ligands to activate T cells. *Proc Natl Acad Sci U S A* 107: 8724–8729
- Gras S, Chen Z, Miles JJ, Liu YC, Bell MJ, Sullivan LC, Kjer-Nielsen L, Brennan RM, Burrows JM, Neller MA et al (2010) Allelic polymorphism in the T cell receptor and its impact on immune responses. *J Exp Med* 207: 1555–1567
- Hashimoto-Tane A, Sakuma M, Ike H, Yokosuka T, Kimura Y, Ohara O, Saito T (2016) Micro-adhesion rings surrounding TCR microclusters are essential for T cell activation. *J Exp Med* 213: 1609–1625
- Huse M (2017) Mechanical forces in the immune system. *Nat Rev Immunol* 17: 679–690
- Husson J, Chemin K, Bohineust A, Hivroz C, Henry N (2011) Force generation upon T cell receptor engagement. *PLoS One* 6: e19680
- Jiang N, Huang J, Edwards LJ, Liu B, Zhang Y, Beal CD, Evavold BD, Zhu C (2011) Two-stage cooperative T cell receptor-peptide major histocompatibility complex-CD8 trimolecular interactions amplify antigen discrimination. *Immunity* 34: 13–23
- Kim ST, Takeuchi K, Sun ZYJ, Touma M, Castro CE, Fahmy A, Lang MJ, Wagner G, Reinherz EL (2009) The  $\alpha\beta$  T cell receptor is an anisotropic mechanosensor. *J Biol Chem* 284: 31028–31037
- Li B, Lu Y, Zhong MC, Qian J, Li R, Davidson D, Tang Z, Zhu K, Argenty J, de Peredo AG et al (2022) Cis interactions between CD2 and its ligands on T cells are required for T cell activation. *Sci Immunol* 7: eabn6373
- Limozin L, Bridge M, Bongrand P, Dushek O, van der Merwe PA, Robert P (2019) TCR-pMHC kinetics under force in a cell-free system show no intrinsic catch bond, but a minimal encounter duration before binding. *Proc Natl Acad Sci U S A* 116: 16943–16948
- Liu B, Chen W, Evavold BD, Zhu C (2014) Accumulation of dynamic catch bonds between TCR and agonist peptide-MHC triggers T cell signaling. *Cell* 157: 357–368
- Liu B, Chen W, Natarajan K, Li Z, Margulies DH, Zhu C (2015) The cellular environment regulates *in situ* kinetics of T-cell receptor interaction with peptide major histocompatibility complex. *Eur J Immunol* 45: 2099–2110
- Ma VP-Y, Hu Y, Kellner AV, Brockman JM, Velusamy A, Blanchard AT, Evavold BD, Alon R, Salaita K (2022) The magnitude of LFA-1/ICAM-1 forces fine-tune TCR-triggered T cell activation. *Sci Adv* 8: 4485
- van der Merwe PA, Dushek O (2011) Mechanisms for T cell receptor triggering. *Nat Rev Immunol* 11: 47–55
- Natkanski E, Lee WY, Mistry B, Casal A, Molloy JE, Tolar P (2013) B cells use mechanical energy to discriminate antigen affinities. *Science* 340: 1587–1590
- Parrott MB, Barry MA (2001) Metabolic biotinylation of secreted and cell surface proteins from mammalian cells. *Biochem Biophys Res Commun* 281: 993–1000
- Pettmann J, Huhn A, Shah EA, Kutuzov MA, Wilson DB, Dustin ML, Davis SJ, van der Merwe PA, Dushek O (2021) The discriminatory power of the T cell receptor. *Elife* 10: 1–42
- Pielak RM, O'Donoghue GP, Lin JJ, Alfieri KN, Fay NC, Low-Nam ST, Groves JT (2017) Early T cell receptor signals globally modulate ligand:receptor affinities during antigen discrimination. *Proc Natl Acad Sci U S A* 114: 12190–12195
- Pierres A, Benoliel AM, Bongrand P (1995) Measuring the lifetime of bonds made between surface-linked molecules. *J Biol Chem* 270: 26586–26592
- Pullen RH, Abel SM (2017) Catch bonds at T cell interfaces: impact of surface reorganization and membrane fluctuations. *Biophys J* 113: 120–131
- Robert P, Aleksic M, Dushek O, Cerundolo V, Bongrand P, van der Merwe PA (2012) Kinetics and mechanics of two-dimensional interactions between T cell receptors and different activating ligands. *Biophys J* 102: 248–257
- Rosette C, Werlen G, Daniels MA, Holman PO, Alam SM, Travers PJ, Gascoigne NR, Palmer E, Jameson SC (2001) The impact of duration versus extent of TCR occupancy on T cell activation: a revision of the kinetic proofreading model. *Immunity* 15: 59–70
- Różycki B, Weikl TR (2021) Cooperative stabilization of close-contact zones leads to sensitivity and selectivity in T-cell recognition. *Cell* 10: 1023
- Różycki B, Mioduszewski Ł, Cieplak M (2014) Unbinding and unfolding of adhesion protein complexes through stretching: interplay between shear and tensile mechanical clamps. *Proteins* 82: 3144–3153
- Rudolph MG, Stanfield RL, Wilson IA (2006) How TCRs bind MHCs, peptides, and coreceptors. *Annu Rev Immunol* 24: 419–466

- Sage PT, Varghese LM, Martinelli R, Sciuto TE, Kamei M, Dvorak AM, Springer TA, Sharpe AH, Carman CV (2012) Antigen recognition is facilitated by invadosome-like protrusions formed by memory/effector T cells. *J Immunol* 188: 3686–3699
- Schwesinger F, Ros R, Strunz T, Anselmetti D, Guntherodt HJ, Honegger A, Jermutus L, Tiefenauer L, Pluckthun A (2000) Unbinding forces of single antibody-antigen complexes correlate with their thermal dissociation rates. *Proc Natl Acad Sci U S A* 97: 9972–9977
- Sibener LV, Fernandes RA, Kolawole EM, Carbone CB, Liu F, McAfee D, Birnbaum ME, Yang X, Su LF, Yu W et al (2018) Isolation of a structural mechanism for uncoupling T cell receptor signaling from peptide-MHC binding. *Cell* 174: 672–687
- Siller-Farfán JA, Dushek O (2018) Molecular mechanisms of T cell sensitivity to antigen. *Immunol Rev* 285: 194–205
- Springer T (1990) Adhesion receptors of the immune system. *Nature* 346: 425–434
- Stepanek O, Prabhakar AS, Osswald C, King CG, Bulek A, Naeher D, Beaufils-hugot M, Abanto ML, Galati V, Hausmann B et al (2014) Coreceptor scanning by the T cell receptor provides a mechanism for T cell tolerance. *Cell* 159: 333–345
- Szymczak P, Cieplak M (2006) Stretching of proteins in a uniform flow. *J Chem Phys* 125: 164903
- Varma R, Campi G, Yokosuka T, Saito T, Dustin ML (2006) T cell receptor-proximal signals are sustained in peripheral microclusters and terminated in the central supramolecular activation cluster. *Immunity* 25: 117–127
- Wu P, Zhang T, Liu B, Fei P, Cui L, Qin R, Zhu H, Yao D, Martinez RJ, Hu W et al (2019) Mechano-regulation of peptide-MHC class I conformations determines TCR antigen recognition. *Mol Cell* 73: 1015–1027
- Zarnitsyna VI, Huang J, Zhang F, Chien Y-H, Leckband D, Zhu C (2007) Memory in receptor-ligand-mediated cell adhesion. *Proc Natl Acad Sci U S A* 104: 18037–18042
- Zhao X, Kolawole EM, Chan W, Feng Y, Yang X, Gee MH, Jude KM, Sibener LV, Fordyce PM, Germain RN et al (2022) Tuning T cell receptor sensitivity through catch bond engineering. *Science* 376: eabl5282
- Zhu C, Chen W, Lou J, Rittase W, Li K (2019) Mechanosensing through immunoreceptors. *Nat Immunol* 20: 1269–1278

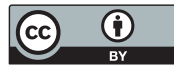

**License:** This is an open access article under the terms of the [Creative Commons Attribution](#) License, which permits use, distribution and reproduction in any medium, provided the original work is properly cited.

## Expanded View Figures

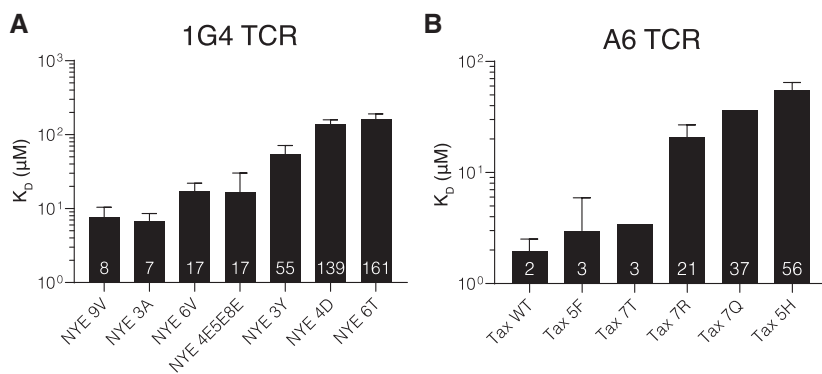

**Figure EV1. Dissociation constants of TCR/pMHC bond measured by SPR.**

A SPR dissociation constants for the 1G4 TCR ( $N = 2-10$ ).

B SPR dissociation constants for the A6 TCR ( $N = 1-6$ ).

Data information: Shown are geometric means with geo. SDs from the  $N$  independent experiments conducted on different days with the numbers in the bar indicating the geometric mean. Data is partially reproduced from Fig 1G and H of our previous measurements (Pettmann et al, 2021) with additional repeats and pMHC variants. Source data are available online for this figure.



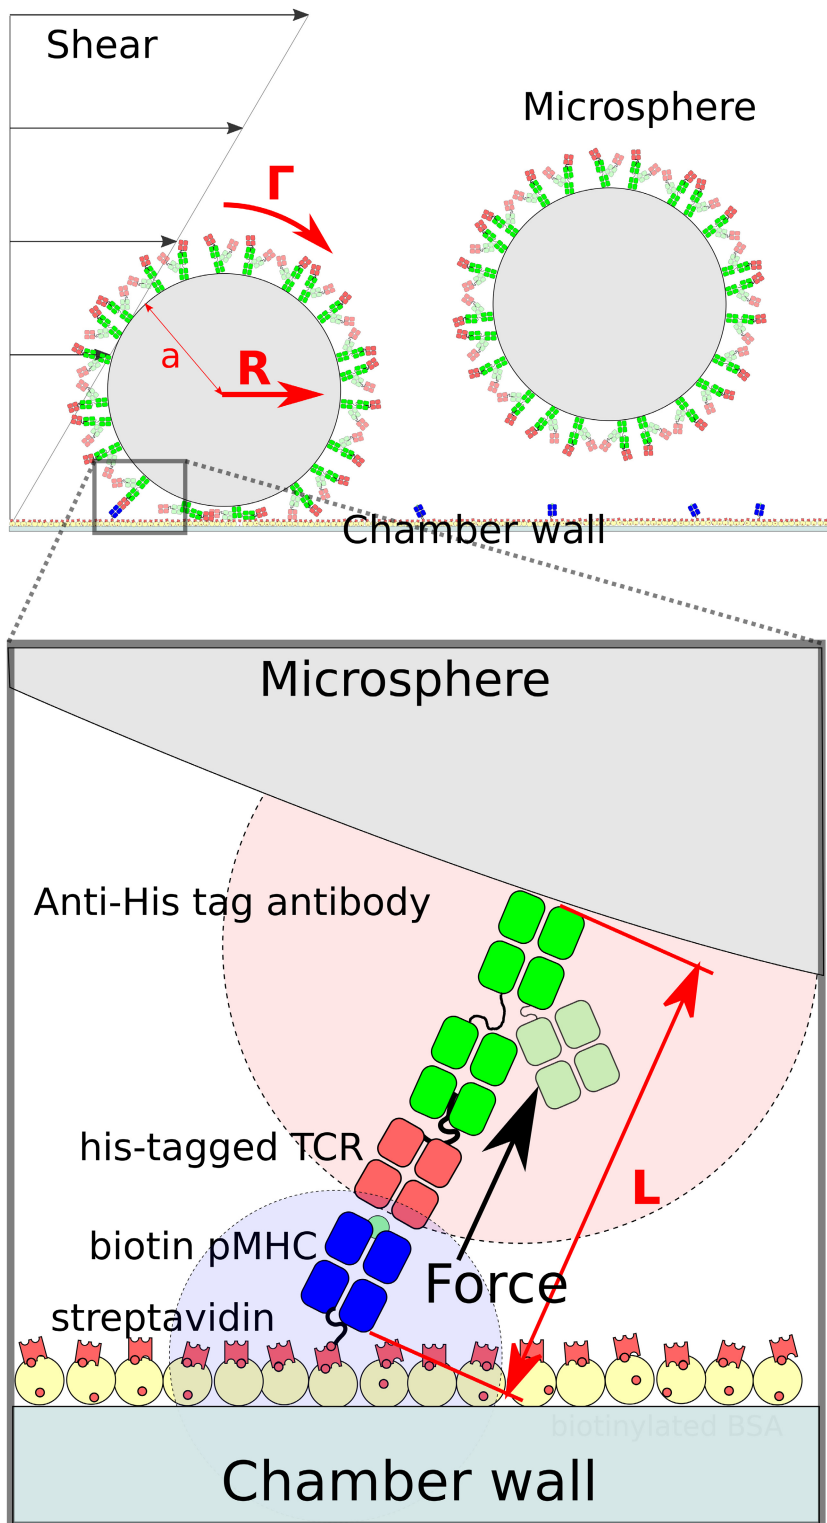

**Figure EV2. Flow velocity resolves into a normal force on the TCR/pMHC as a result of anchoring flexibility.**

Biotinylated pMHC and antibody-bound TCR have rotational freedom as a result of a flexible linker between the avi-tag and the pMHC and between the TCR and the his-tag that the antibody binds. This allows their binding site to diffuse in volumes represented by portions of disc in light blue for the pMHC and light red for TCR. Near to the surface of the chamber, the flow velocity is given by a first-order approximation:  $v(z) = Gz$ , where  $z$  is the distance to the surface in nm and  $G$  is the shear rate constants in  $s^{-1}$ . The shear stress  $T_s$  (in  $N/m^2$  or pascals) applied corresponds to the force applied by the flow per surface unit and is calculated by the product between  $G$  and the viscosity of the medium ( $\mu$ ) in Pa/s:  $T_s = \mu G$ . Taking into account the dimensions of the LFC section  $l \times H$ , shear rate can be determined for a given flow  $Q$  using the formula:  $G \approx 6Q/H^2$ . When the microsphere makes a link with the surface the flow creates a hydrodynamic force ( $R$ ) given by the equation:  $R \approx 32\mu a^2 G = 1.7005 \times 6\pi\mu a^2 G$  where  $a$  is the radius of the microsphere. The microsphere is also subjected to a torque force ( $\Gamma$ ):  $\Gamma \approx 0.9440 \times 4\mu a^3 G$ . In addition, a lever effect increases the force applied to the interaction, so the total force applied ( $F$ ) is given by the equation:  $F \approx (R + \Gamma/a)\sqrt{a/2L}$  where  $L$  is the length of the formed bond, that is, the length of the link. Additional details can be found in (Pierres et al, 1995).

**Figure EV3. Linear binding density correlation indicates assay operation in single molecule bond regime.**

A Linear binding densities for all tested TCR/pMHC combinations. A linear correlation indicates a single-molecule binding regime.

B Example of survival curves of the same TCR/pMHC interaction with different pMHC immobilization levels. Shown is 1G4/NYE 6T.

Data information: Data points in (A) represent mean and SD from independent experiments using 1G4 TCR binding NYE 9V ( $N = 7$ ), NYE 3A ( $N = 9$ ), NYE 6V ( $N = 8$ ), NYE 3Y ( $N = 10$ ), NYE 4D ( $N = 6$ ), NYE 6T ( $N = 9$ ), NYE 4E5E8E ( $N = 8$ ) and A6 TCR binding Tax WT ( $N = 9$ ), Tax 5F ( $N = 11$ ), Tax 7T ( $N = 11$ ), Tax 7R ( $N = 8$ ), Tax 7Q ( $N = 9$ ), Tax 5H ( $N = 8$ ), and the OT-I TCR binding OVA ( $N = 11$ ).

Source data are available online for this figure.

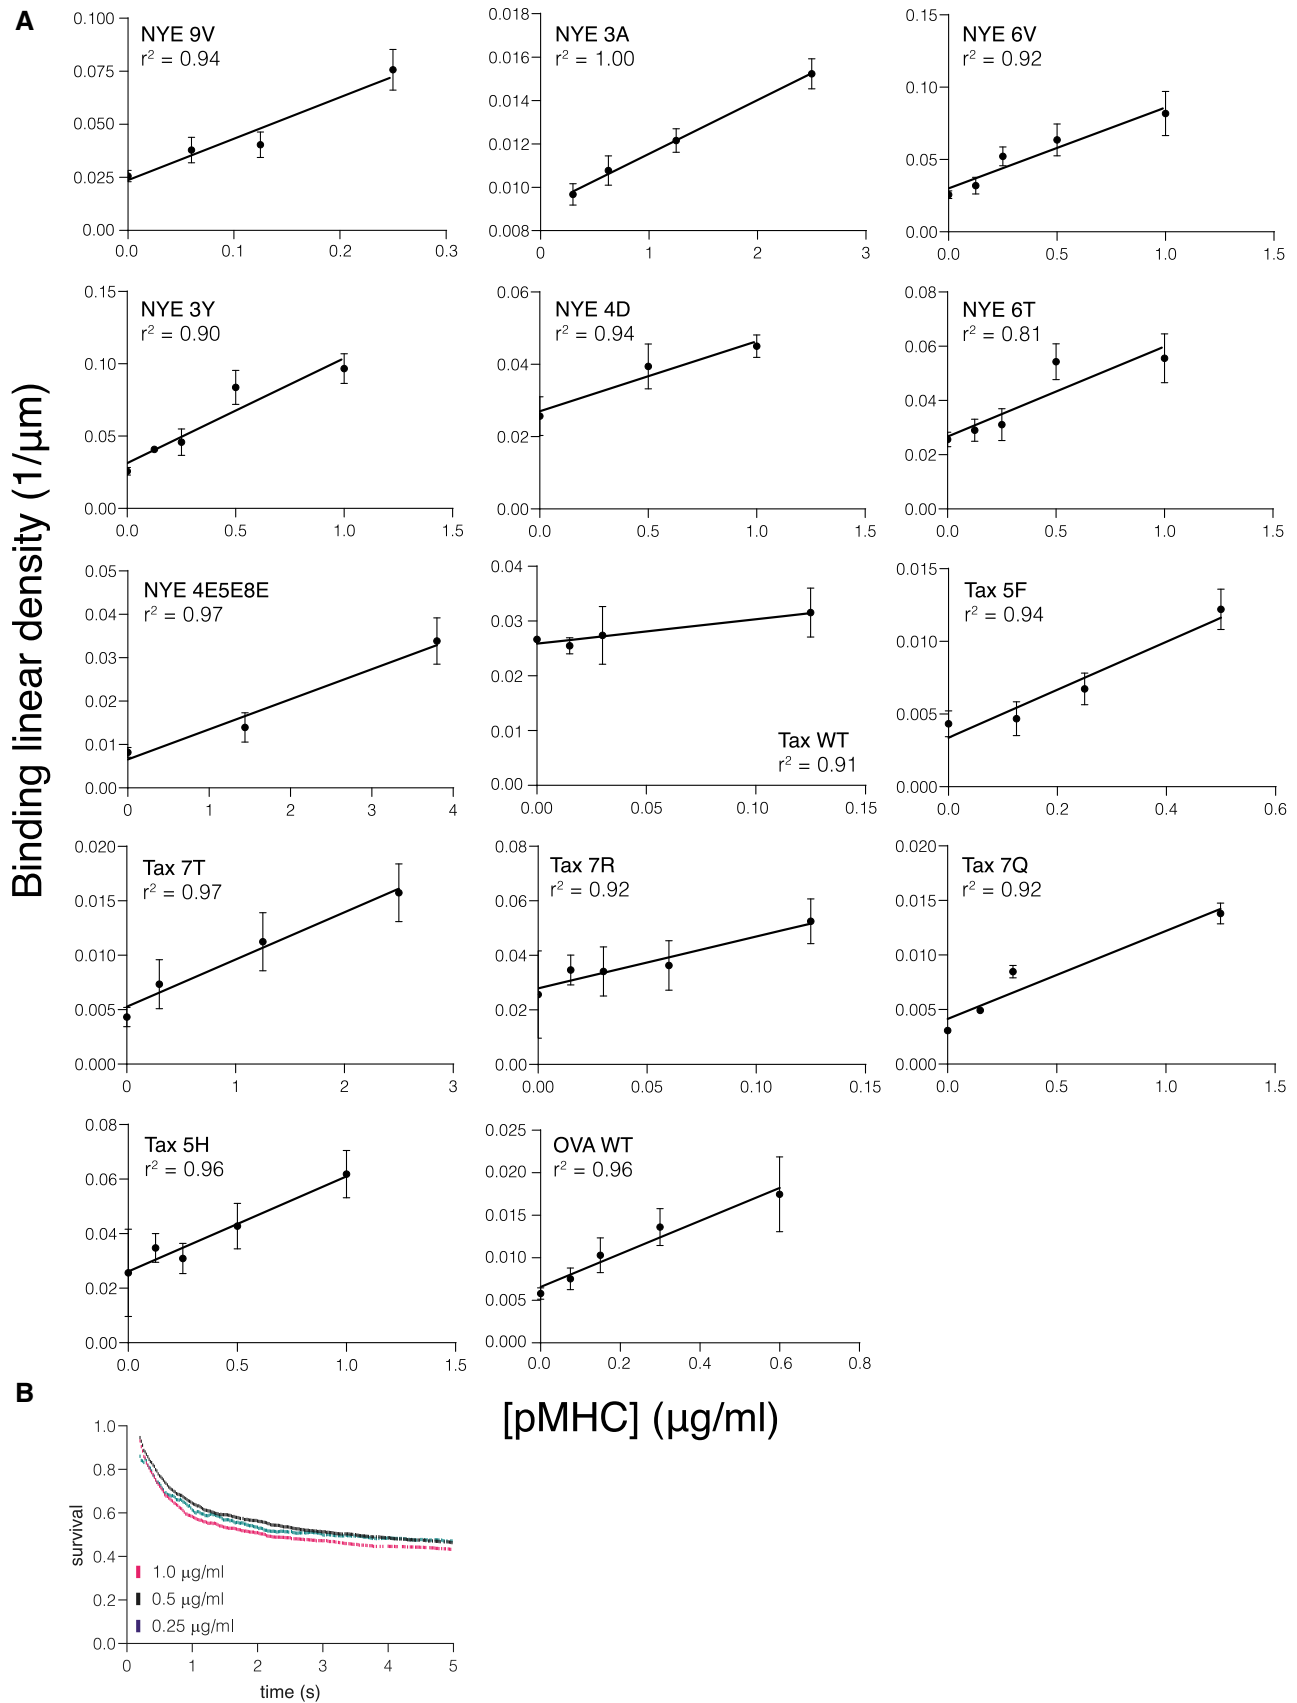

Figure EV3.

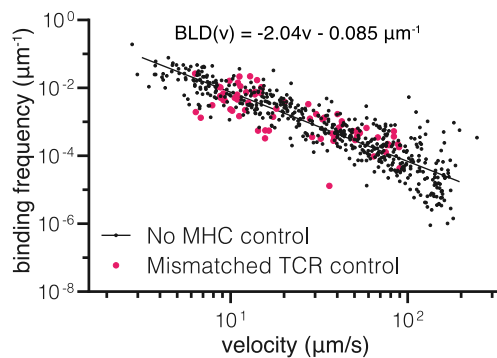

**Figure EV4. Binding linear density for control surfaces over flow velocity.**

Binding linear density (BLD) of TCR-coated beads over surfaces without pMHC (black – no MHC control) or surfaces with a pMHC that does not match the TCR on the bead (pink – mismatch). Each dot represents one experiment/flow cell. Mismatched control is pooled data from experiments with 1G4/OVA, 1G4/Tax WT, 1G4/Tax 7R, A6/NYE 4D, A6/NYE 6V, and A6/OVA. No pMHC control was fitted with a linear curve in loglog space. Source data are available online for this figure.

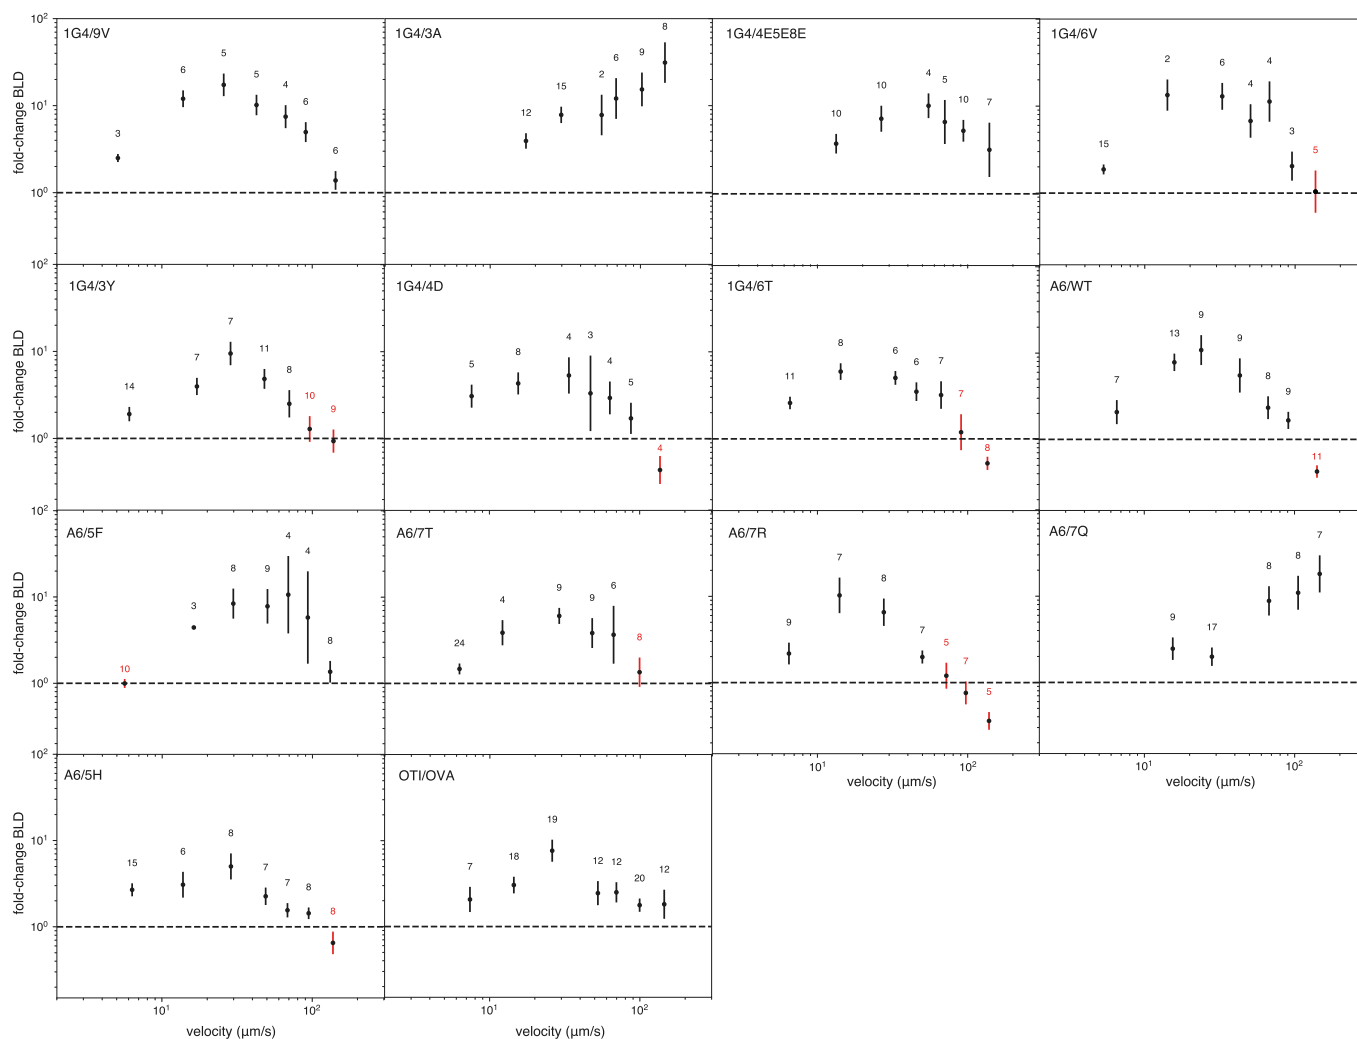

**Figure EV5. Specific TCR/pMHC interactions show higher binding linear densities at most flow velocities.**

The ratio of BLD between the indicated samples and the no pMHC control. Points mark the geometric mean with geo. SEM at different velocity bins. Velocity categories where the lower error bar < 1 were excluded (red). The number of experiments binned in each velocity category is indicated above each data point. Source data are available online for this figure.

**Appendix**

**Table of Contents**

Appendix Figures - Page 2-14

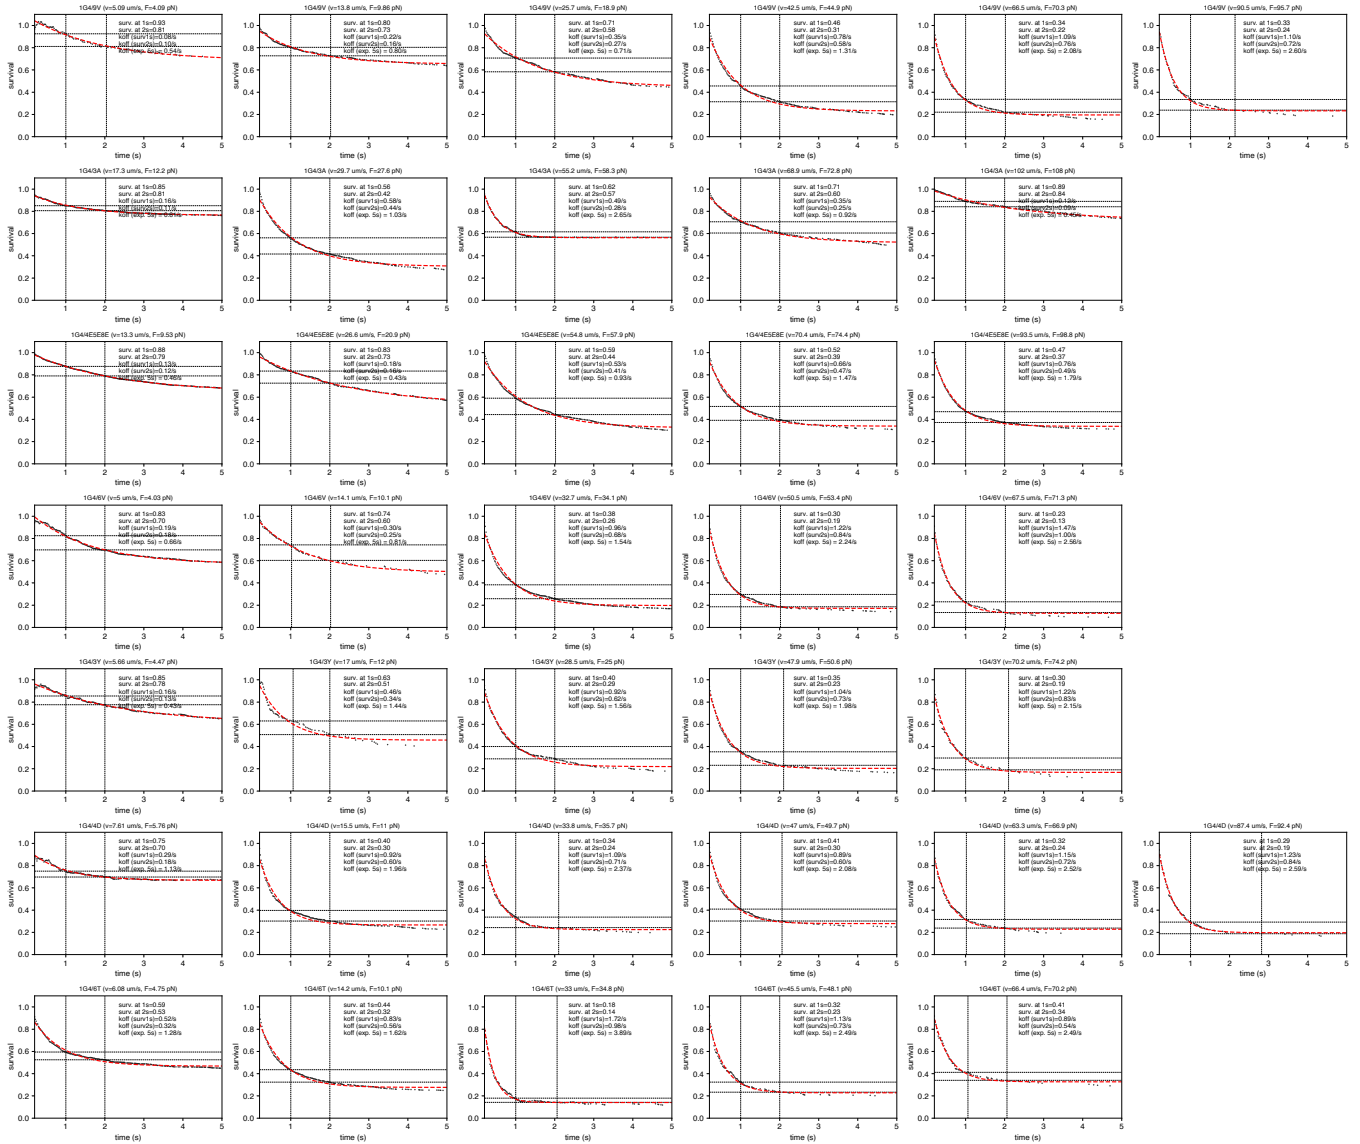

**Appendix Figure S1. Survival analysis for the 1G4 TCR with different pMHCs at different flow velocities/forces.**

The applied force increases from left to right across the columns and each row is a different pMHC (indicated in panel title). The off-rate is estimated by the survival at 1 s, survival at 2 s, or by an exponential fit of the first 5 s (values are indicated). See main text and methods for details.

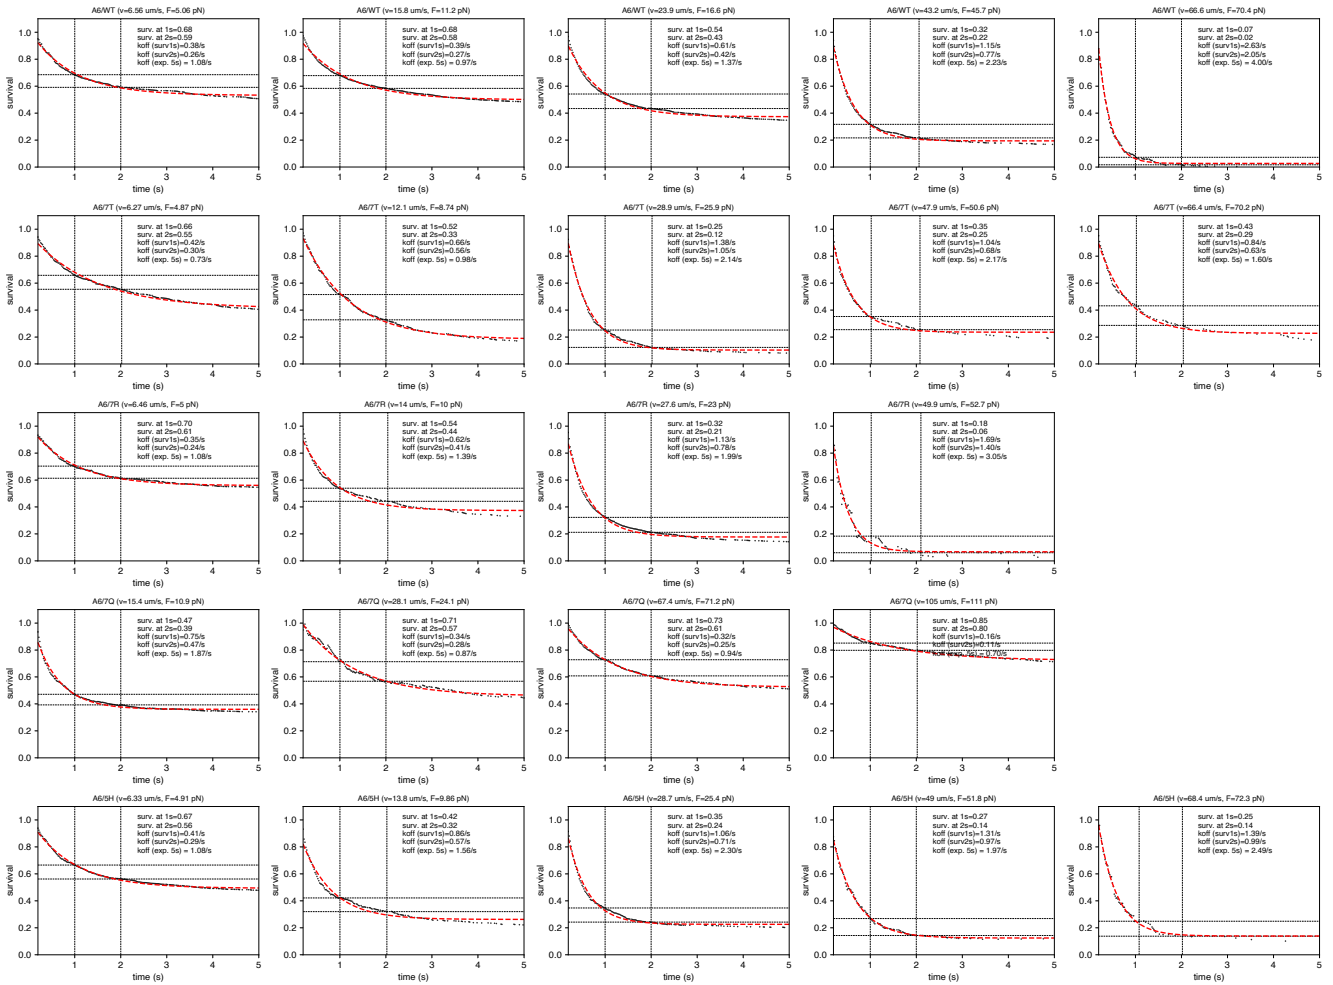

**Appendix Figure S2. Survival analysis for the A6 TCR with different pMHCs at different flow velocities/forces.**

The applied force increases from left to right across the columns and each row is a different pMHC (indicated in panel title). The off-rate is estimated by the survival at 1 s, survival at 2 s, or by an exponential fit of the first 5 s (values are indicated). See main text and methods for details.

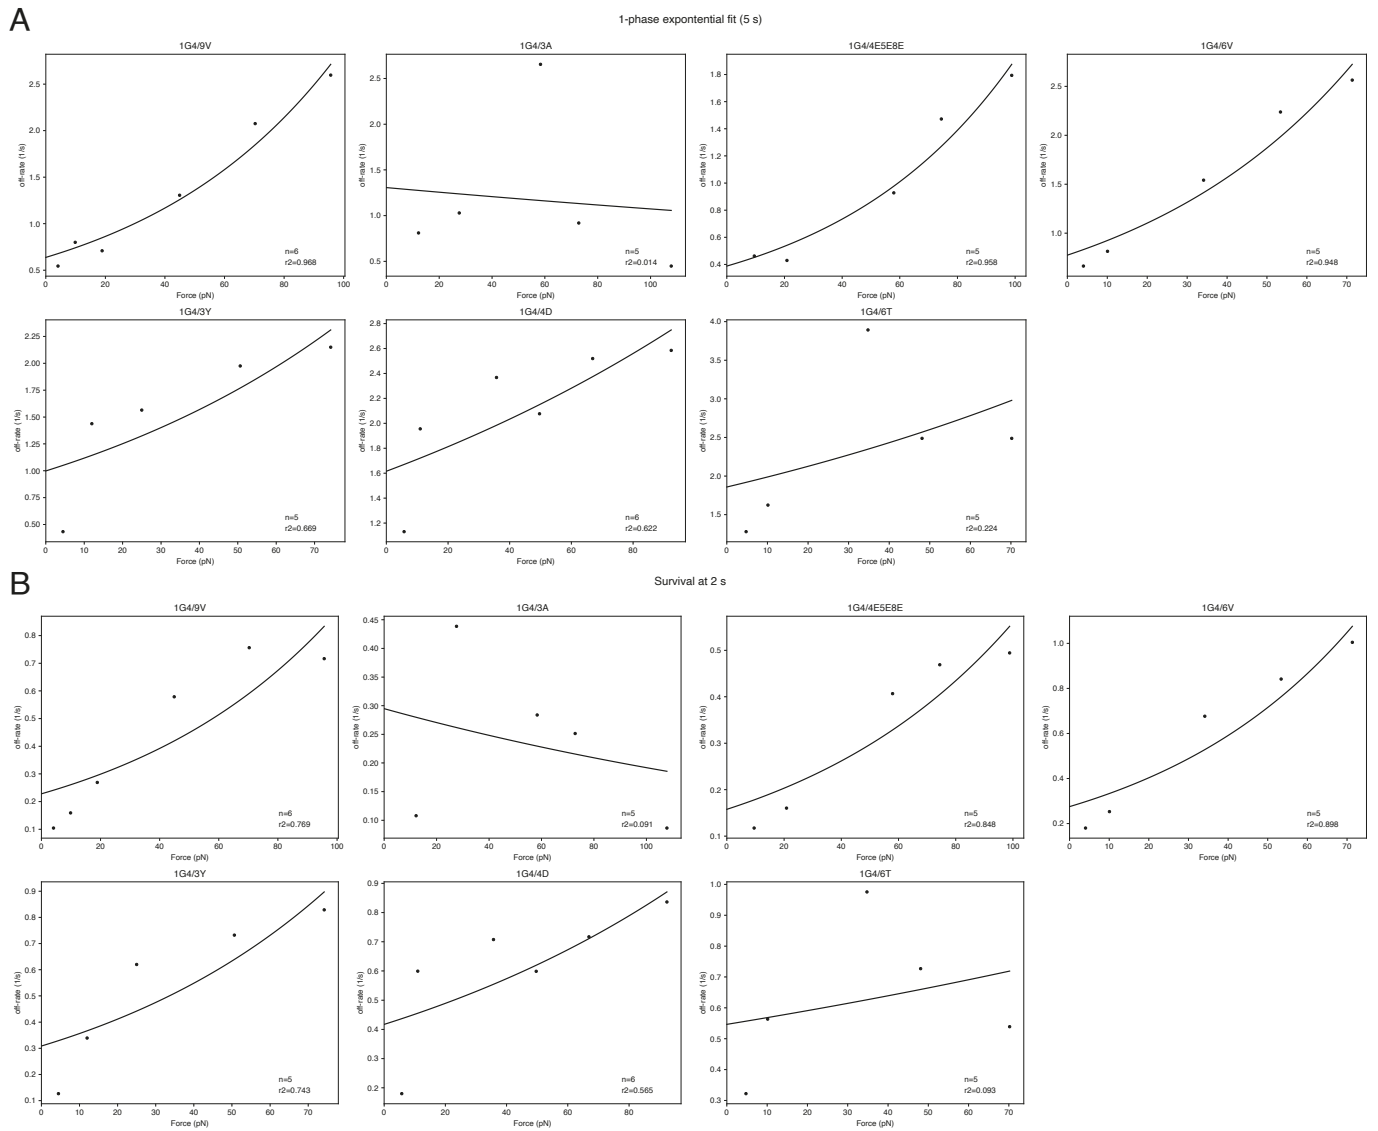

**Appendix Figure S3. Off-rate over force for the 1G4 TCR fitted with Bell's model using off-rates calculated by (A) exponential fit or (B) survival at 2 s (see Appendix Figure S1).**



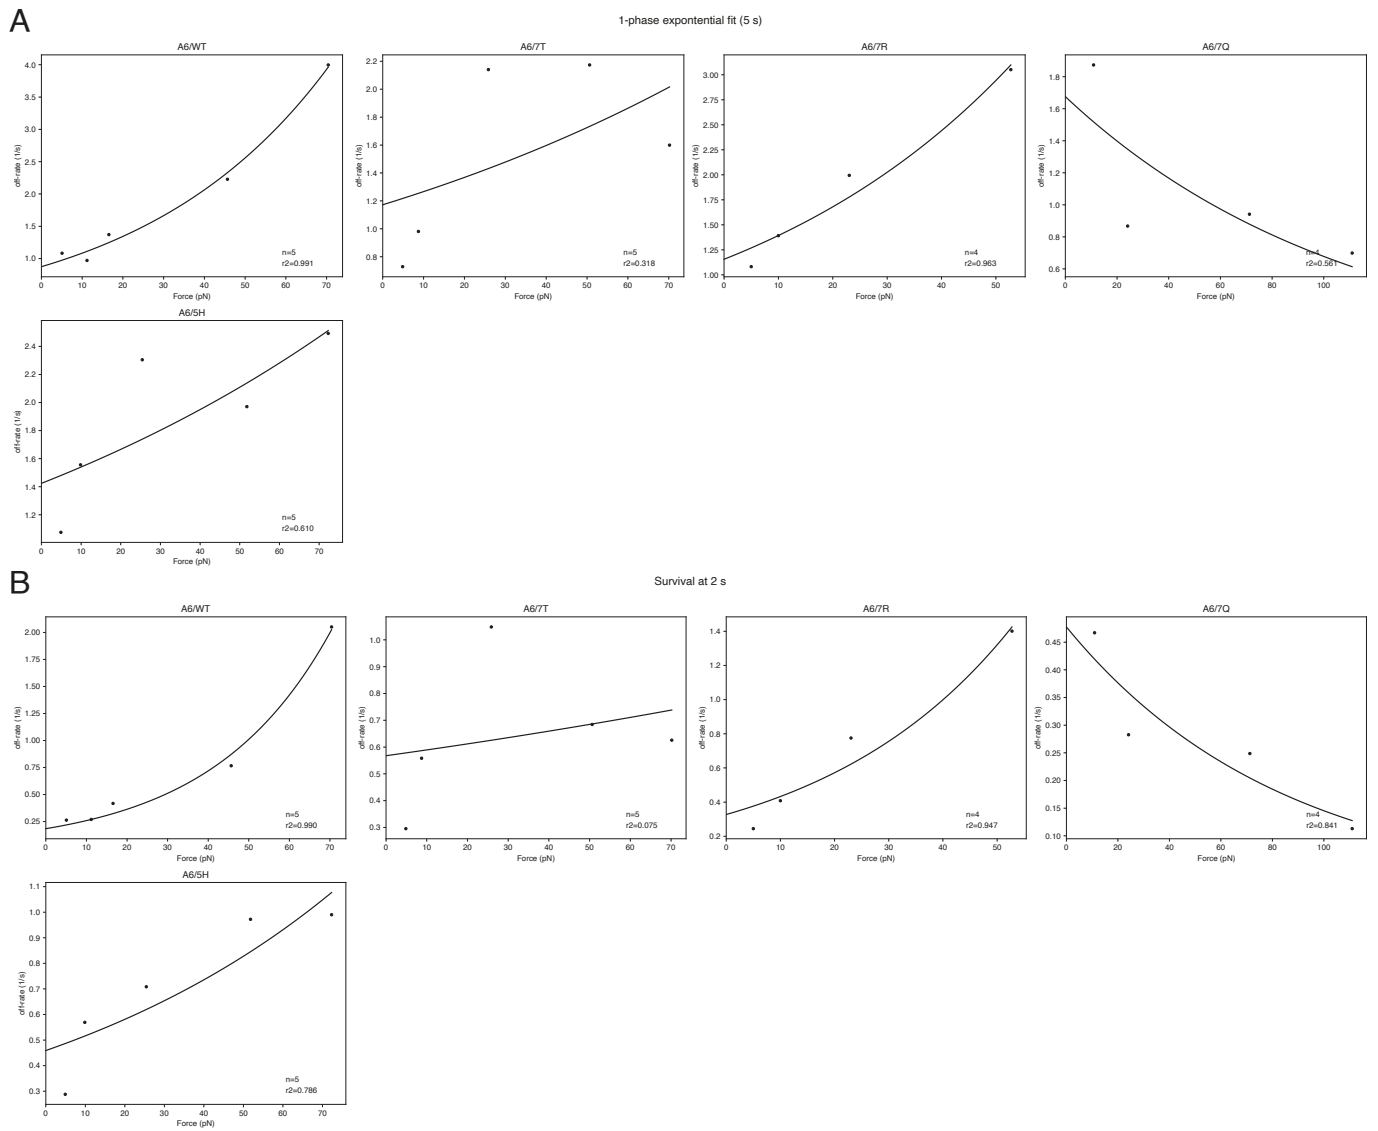

**Appendix Figure S4. Off-rate over force for the A6 TCR fitted with Bell's model using off-rates calculated by (A) exponential fit or (B) survival at 2 s (see Appendix Figure S2).**

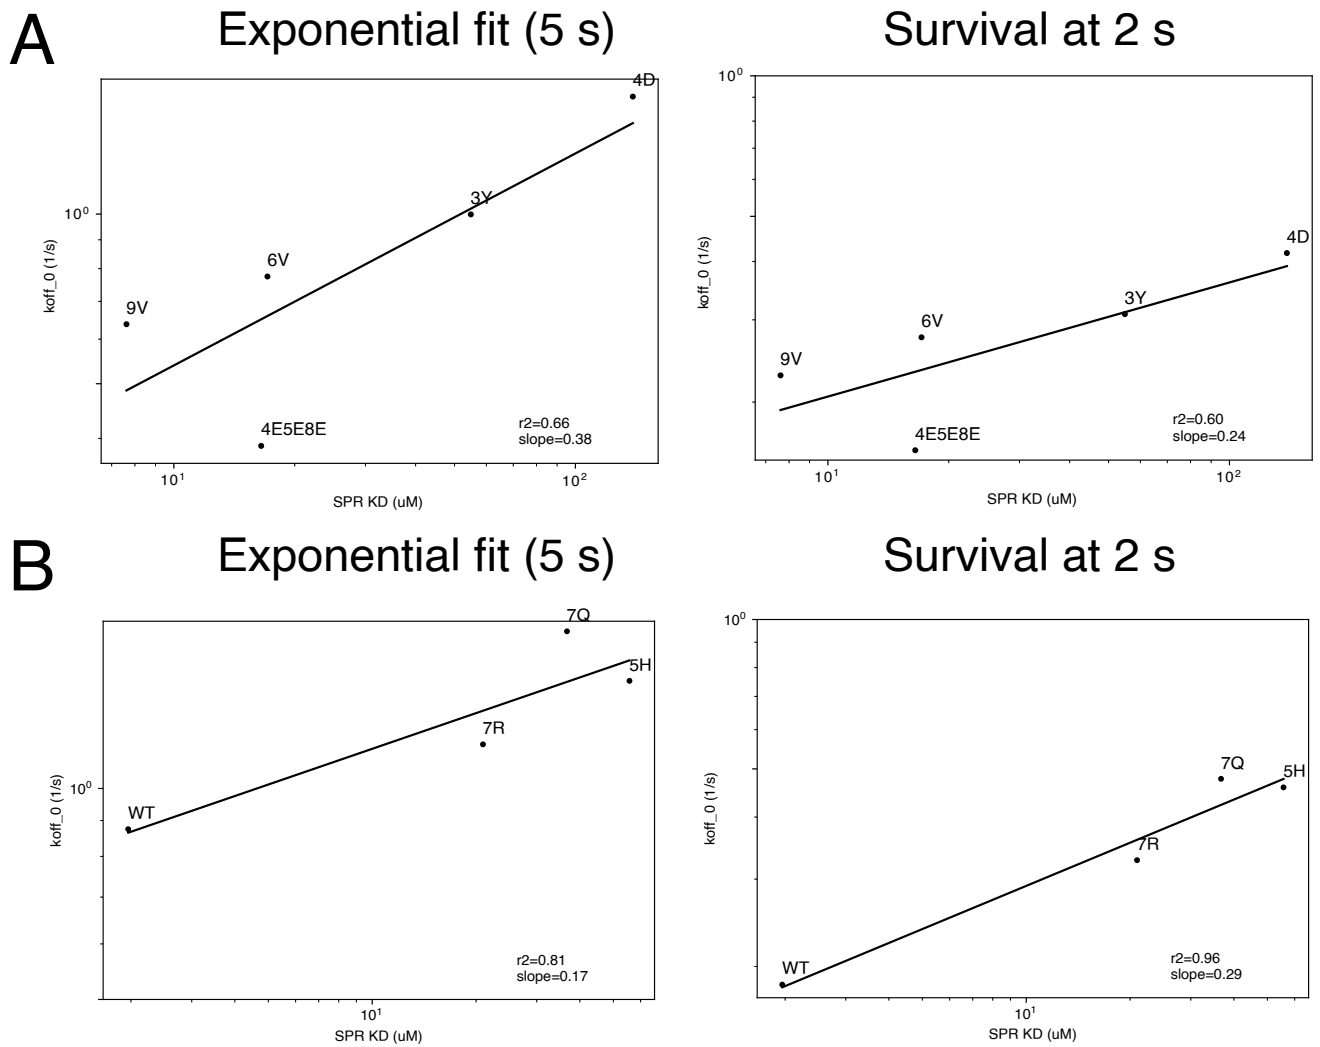

**Appendix Figure S5. Correlations between zero-force off-rate determined by Bell's model using two different analysis methods (Appendix Figure S1 & Figure S2)) and the SPR  $K_D$  for the (A) 1G4 and (B) A6 TCR.**

### A Exponential fit (5 s)

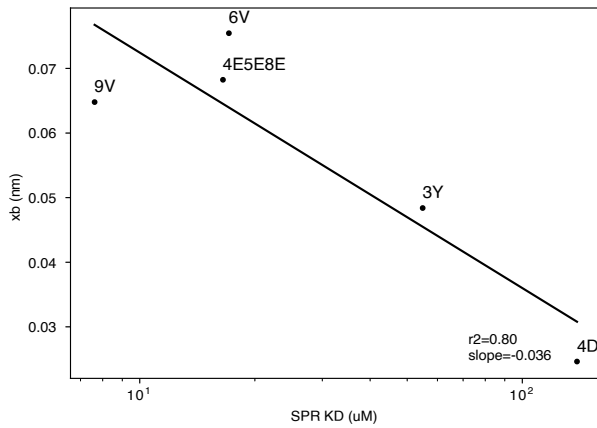

### Survival at 2 s

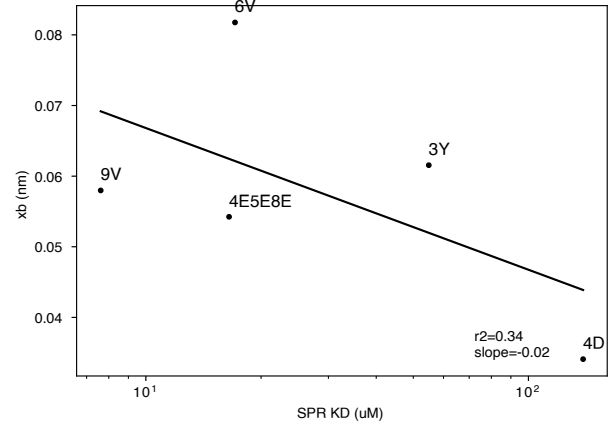

### B Exponential fit (5 s)

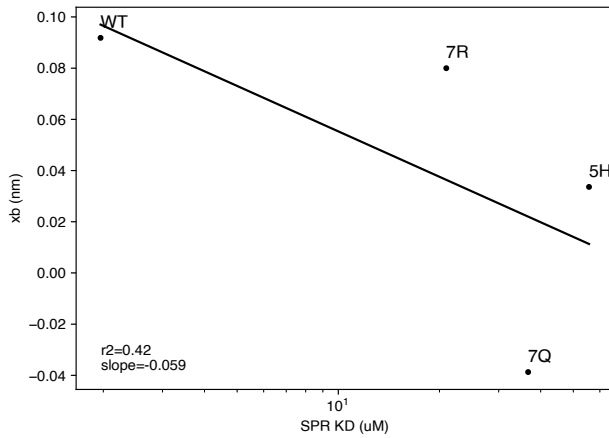

### Survival at 2 s

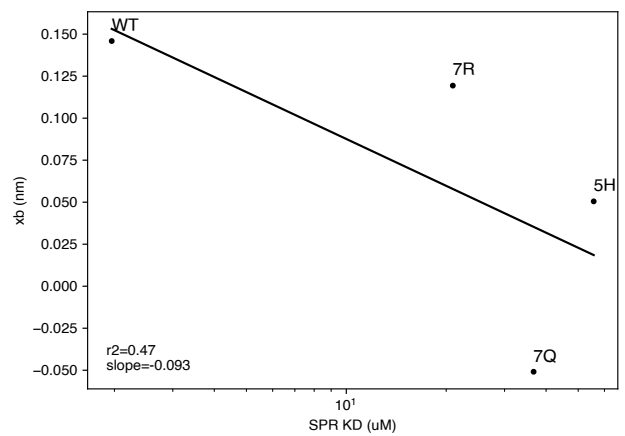

**Appendix Figure S6. Correlations between the force sensitivity parameter ( $x_\beta$ ) determined by Bell's model using two different analysis methods (Appendix Figure S1 & Figure S2)) and the SPR  $K_D$  for the (A) 1G4 and (B) A6 TCR.**

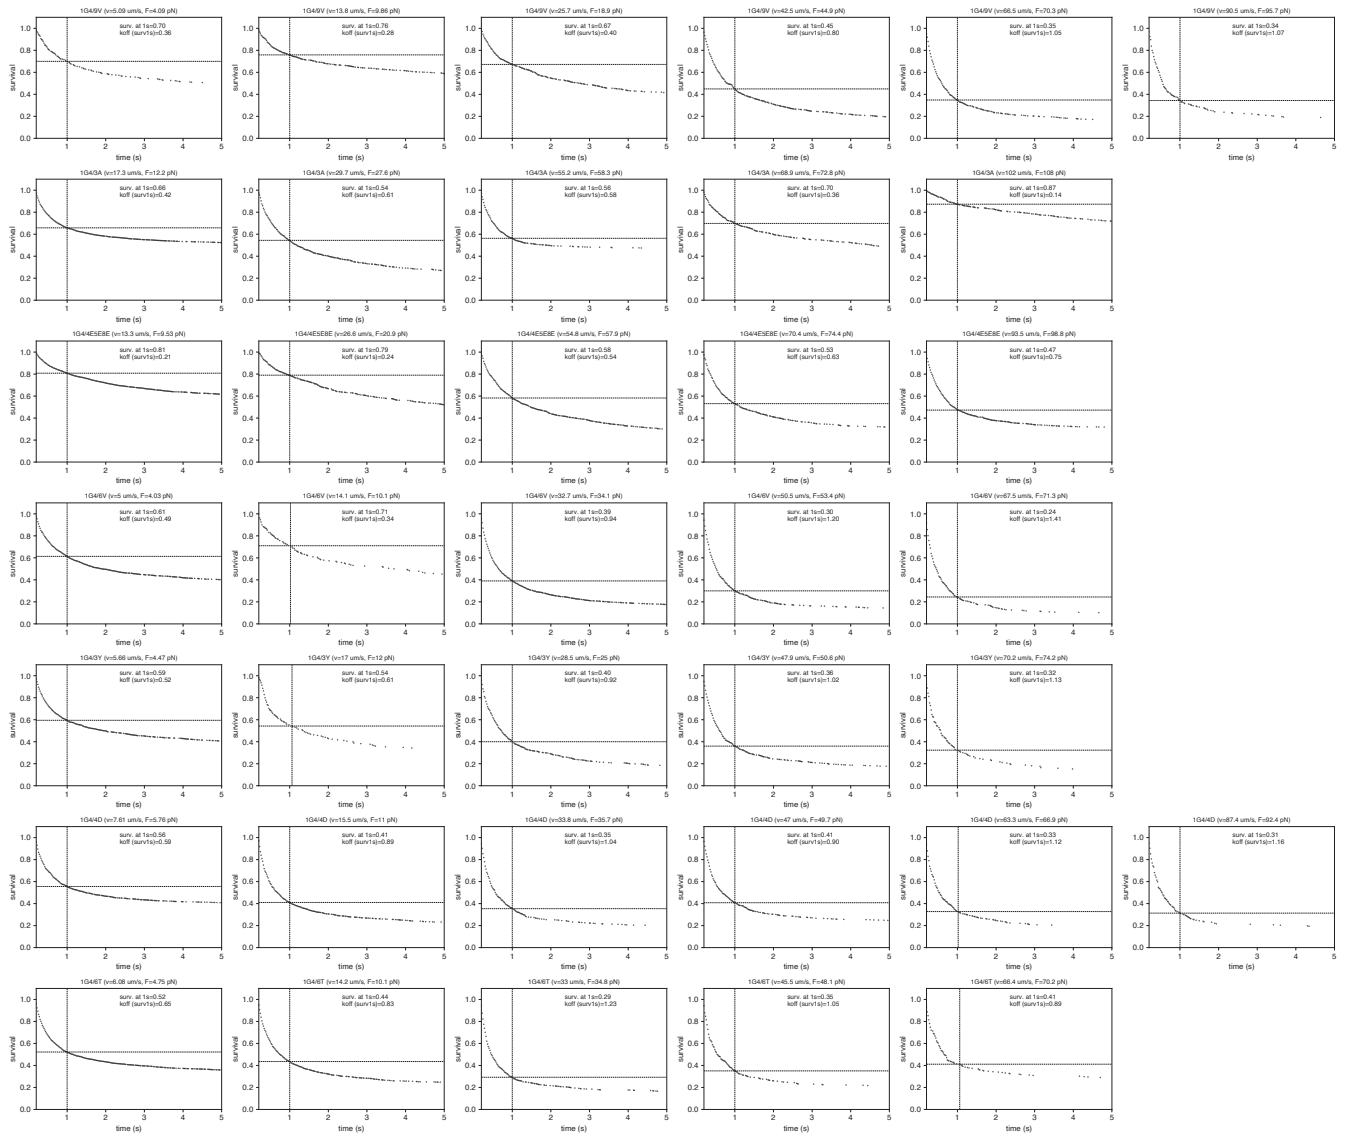

**Appendix Figure S7. Raw survival curves for the 1G4 TCR (without correction for non-specific binding).**  
 Figure analogous to Appendix [Figure S1](#) except the survival curves have not been corrected for non-specific binding.

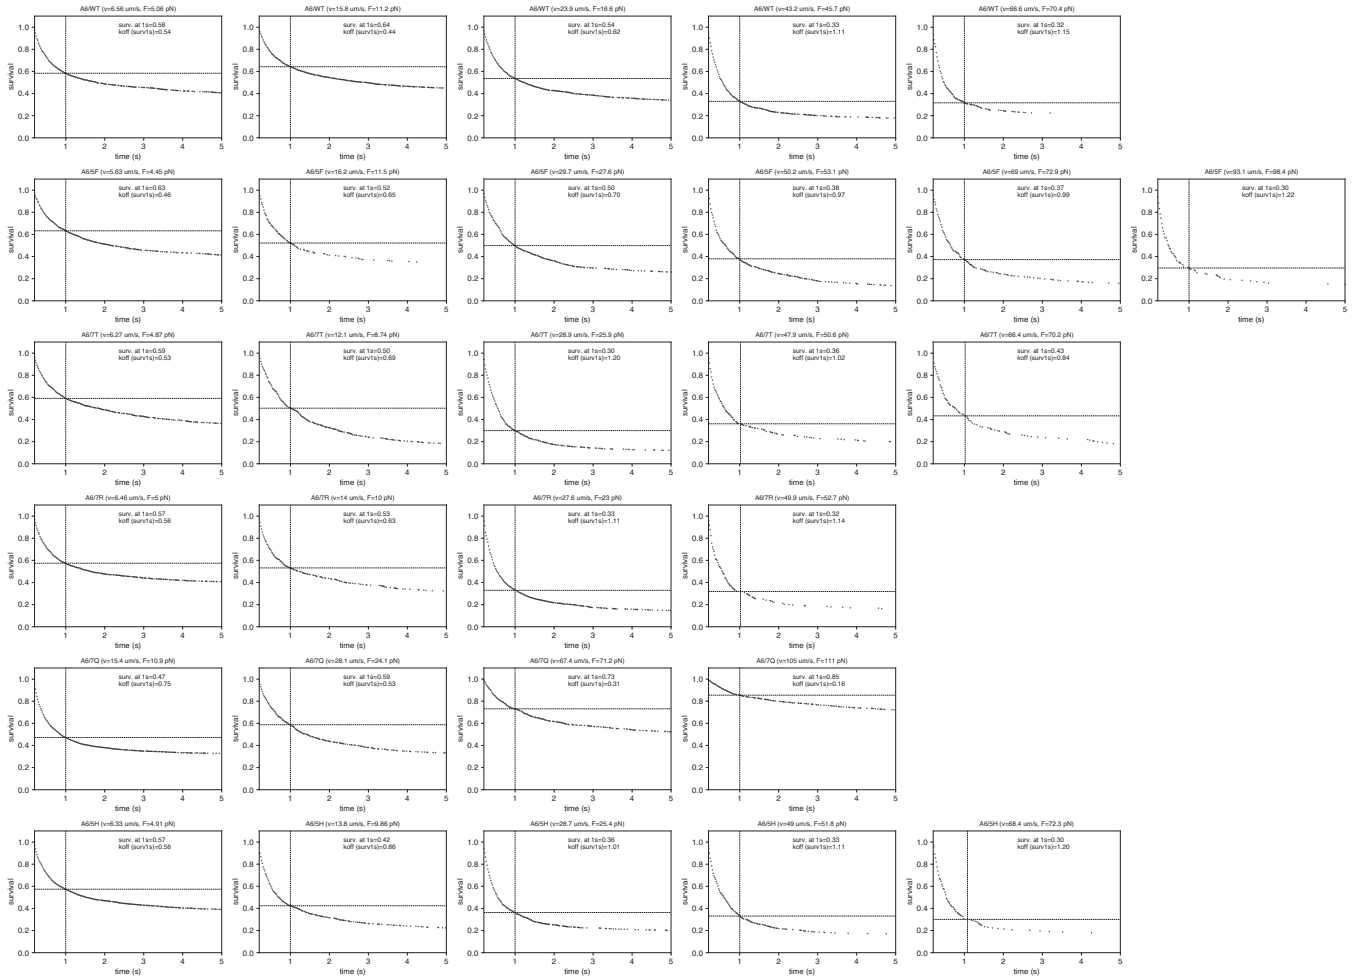

**Appendix Figure S8. Raw survival curves for the A6 TCR (without correction for non-specific binding).** Figure analogous to Appendix [Figure S2](#) except the survival curves have not been corrected for non-specific binding.

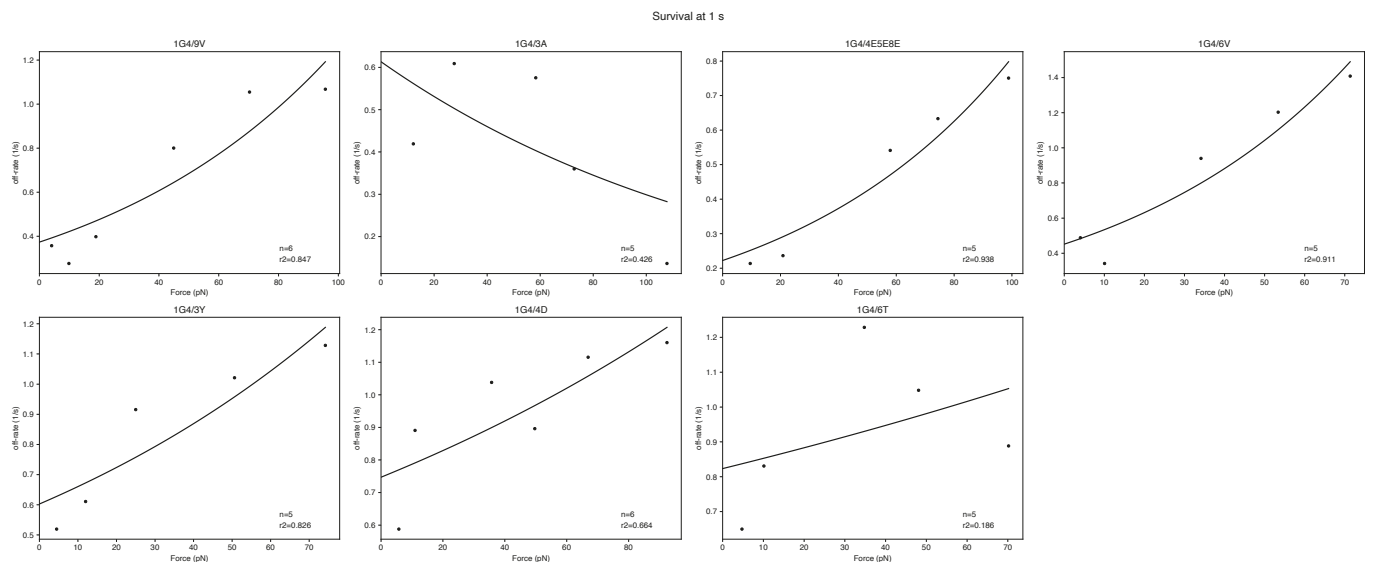

**Appendix Figure S9. Off-rate over force for the 1G4 TCR fitted by Bell's model using data from Appendix [Figure S7](#) (without correction for non-specific binding).** Off-rates were calculated from survival at 1 s.

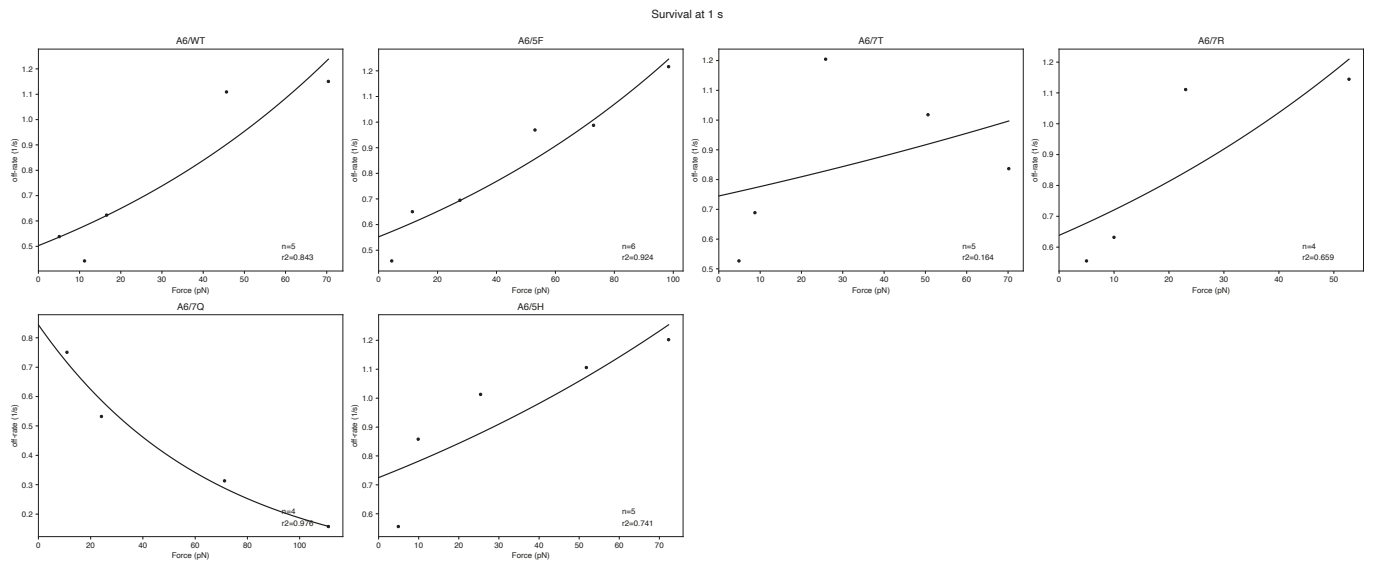

**Appendix Figure S10.** Off-rate over force for the A6 TCR fitted by Bell's model using data from Appendix Figure S8 (without correction for non-specific binding). Off-rates were calculated from survival at 1 s.

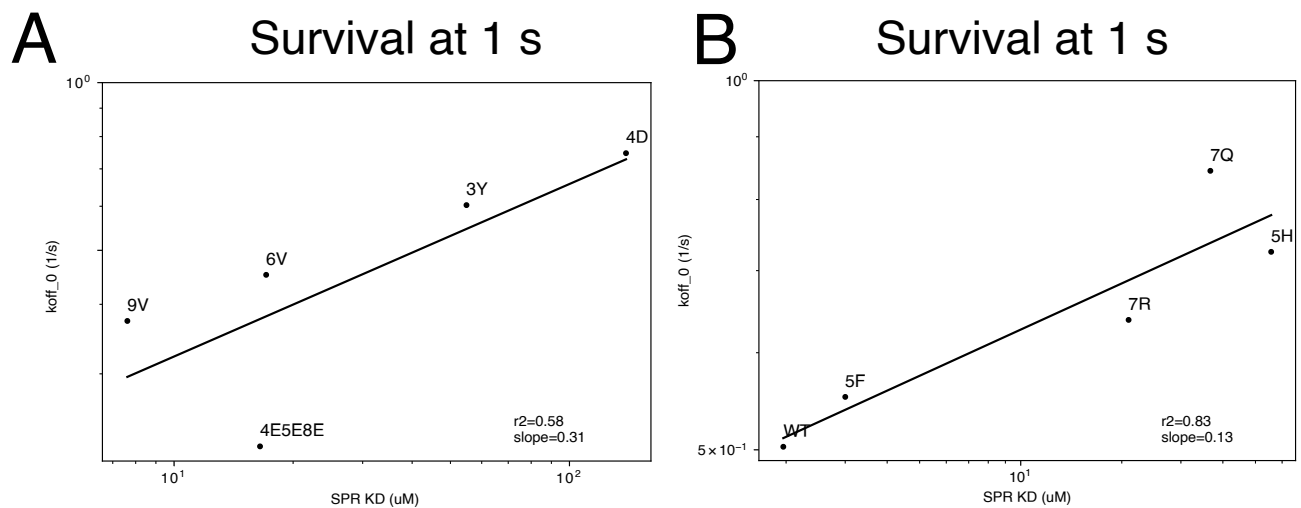

**Appendix Figure S11.** Correlations between zero-force off-rate and SPR  $K_D$  for the (A) 1G4 and (B) A6 TCRs (without correction for non-specific binding, see Appendix Figure S9 & Figure S10).

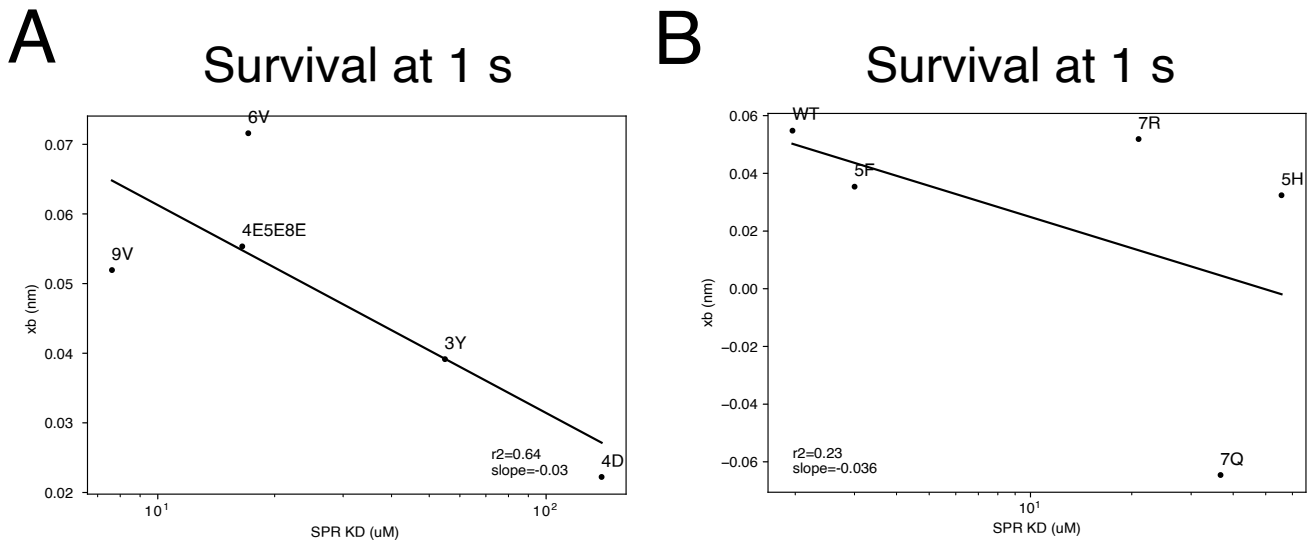

**Appendix Figure S12. Correlations between the force sensitivity  $x_\beta$  and SPR  $K_D$  for the (A) 1G4 and (B) A6 TCRs (without correction for non-specific binding, see Appendix Figure S9 & Figure S10).**

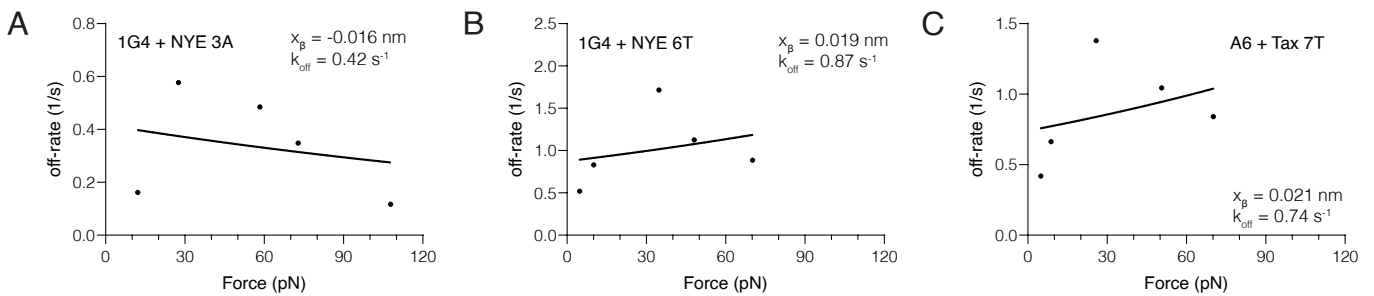

**Appendix Figure S13. Non-canonical TCR/pMHC bonds.**

(A–C) Data fitted with Bell's model. Since all of them did not show a classical force-response, as predicted by Bell's model, we excluded them from any correlation. Notably, they all exhibit slip bond behavior at low forces. The number of independent experiments that were combined to produce the estimated off-rates are: 9 (1G4/3A), 9 (1G4/6T), 11 (A6/7T). Data shown is from fitting off-rates obtained from the survival at 1 s analysis.

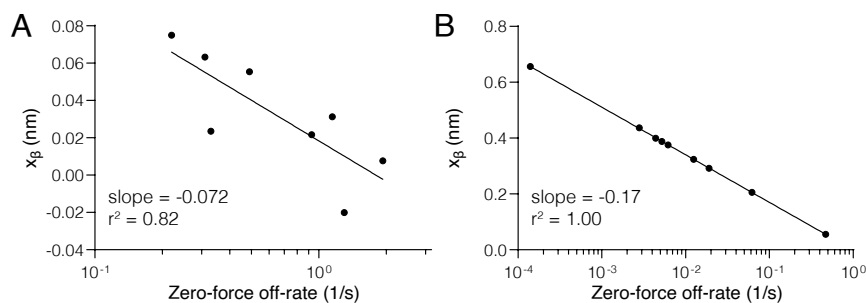

**Appendix Figure S14. Negative  $x_\beta$   $k_{\text{off}}$  correlation is reproduced in two other studies.**

(A) We previously generated data at 25°C with a similar correlation using the 1G4 TCR and peptide variants, as well as, MHC molecules with different mutations (Robert et al., 2012). (B) Schwesinger et al. found a negative correlation for different antibodies binding the same antigens when measured by atomic force microscopy (Schwesinger et al., 2000).

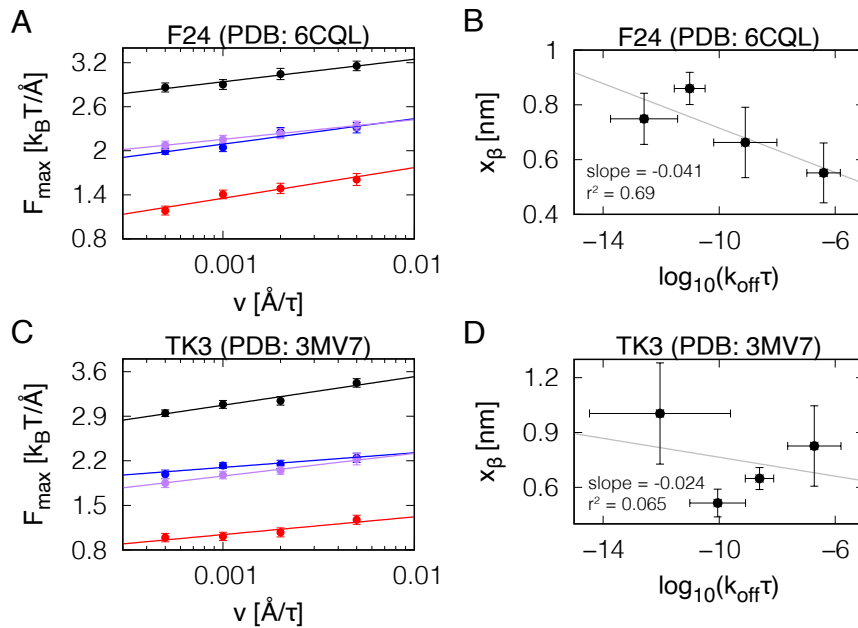

**Appendix Figure S15. Negative  $x_\beta$   $k_{\text{off}}$  correlation is reproduced in two other TCRs.**

Analogous to Figure 3D–G but for two other pMHCs in complexes with the F24 TCR (A–B) and the TK3 TCR (C–D). The negative correlation between  $x_\beta$  and  $\log(k_{\text{off}})$  is observed also for these TCR-pMHC complexes (B and D).

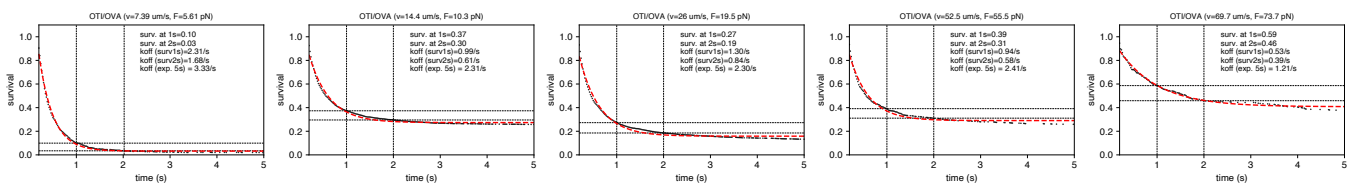

**Appendix Figure S16. Survival analysis of the OT-I TCR interacting with the OVA pMHC under different applied forces.**

The applied force increases from left to right (indicated in panel title). The off-rate is calculated using the survival at 1 s, survival at 2 s, or an exponential fit.



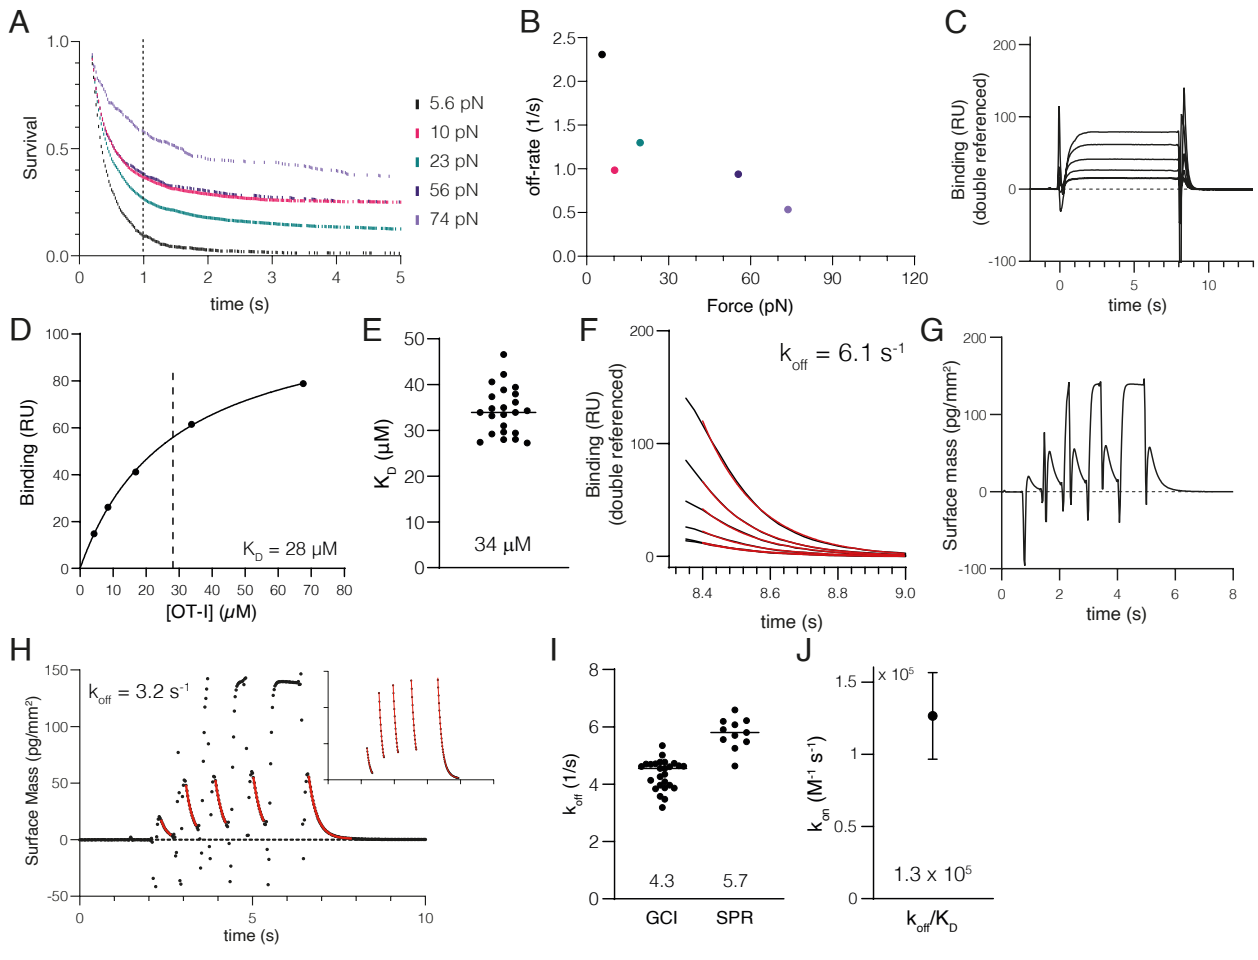

**Appendix Figure S17. The OT-I TCR binds OVA with low affinity and a catch bond.**

**(A)** Example of bead survival over time at different velocities/forces. The time to measure survival (1 s) is shown as dotted line. **(B)** Off-rates at different applied forces. Colors correspond to forces in (A). The number of independent experiments performed on different days that were combined to produce the estimated off-rates are  $N=11$ . **(C)** Representative surface plasmon resonance (SPR) sensogram of OT-I TCR binding immobilized OVA pMHC at five different concentrations of TCR. **(D)** Steady-state RU from (A) plotted over the TCR concentration fitted by a one-site specific binding model to determine  $K_D$  (solid line). **(E)** Fitted  $K_D$  values from multiple experiments ( $N=23$ ). **(F)** Dissociation phase from (A) fitted with a one phase exponential decay model to determine  $k_{\text{off}}$  (solid red lines). **(G)** Representative grating-coupled interferometry (GCI) sensogram of OT-I TCR binding immobilized OVA pMHC at one concentration of TCR injected for increasing durations. **(H)** Fit of the entire sensogram data from (G) determined  $k_{\text{off}}$  (red line). **(I)** Fitted  $k_{\text{off}}$  values from four and two independent experiments with different TCR and/or pMHC concentrations using GCI ( $N=26$ ) or SPR ( $N=11$ ), respectively. **(J)** Calculated on-rate ( $k_{\text{on}}$ ) using the fitted values of  $k_{\text{off}}$  ( $4.3 \text{ s}^{-1}$ ) and  $K_D$  ( $34 \mu\text{M}$ ).

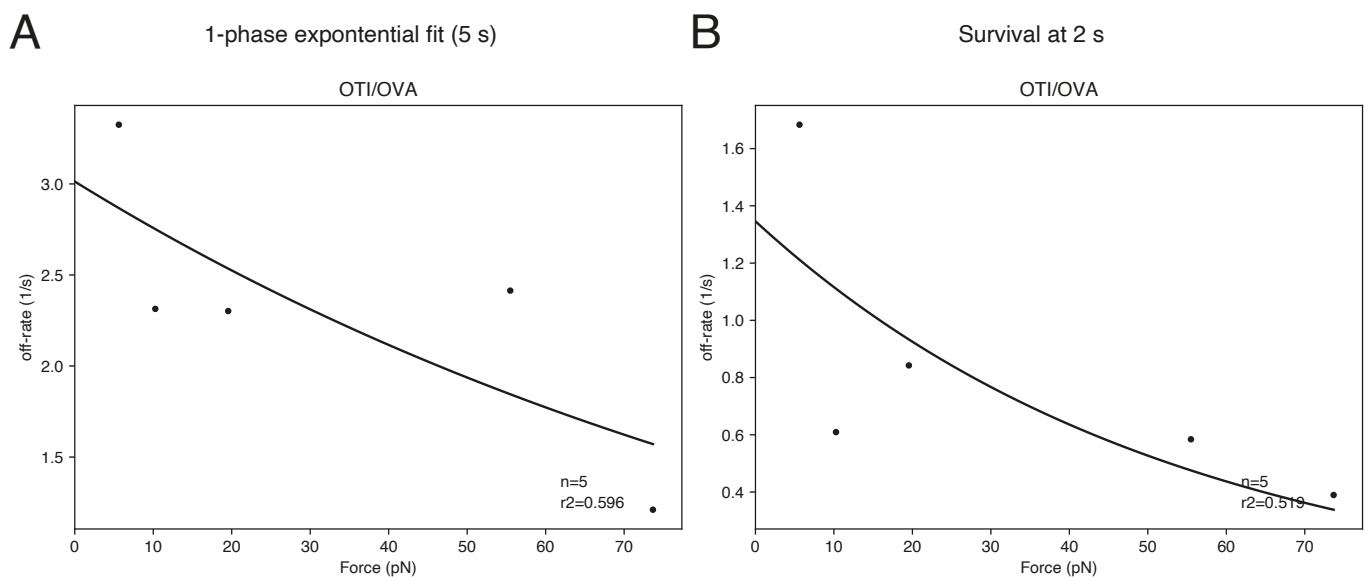

**Appendix Figure S18. Off-rate over force for the OT-I/OVA interaction using two different methods to calculate the off-rate.** The off-rate is calculated using **(A)** an exponential fit or **(B)** survival at 2 s. The off-rates are taken from Appendix [Figure S16](#). The off-rate calculated using survival at 1 s is shown in Appendix [Figure S17B](#).
